# Supplementary material for: Light-dependent single-cell heterogeneity in the chloroplast redox state regulates cell fate in a marine diatom
Source: eLife journal article supplement (doi:10.7554/elife.47732), 2019-06-24
Supplement: supp [file elife-47732-supp-v1.zip]

Archive with 20 entries (20 files):
- elife_poa_e47732_Figure_2_figure_supplement_1.tif
- elife_poa_e47732_Figure_4_figure_supplement_1.tif
- elife_poa_e47732_Figure_4_figure_supplement_3.tif
- elife_poa_e47732_Figure_2_figure_supplement_2.tif
- elife_poa_e47732_Figure_8_figure_supplement_2.tif
- elife_poa_e47732_Figure_2_figure_supplement_3.tif
- elife_poa_e47732_Figure_4_figure_supplement_2.tif
- elife_poa_e47732_Figure_4_figure_supplement_4.tif
- elife_poa_e47732_Figure_3_figure_supplement_2.tif
- elife_poa_e47732_Figure_7_figure_supplement_2.tif
- elife_poa_e47732_Figure_4_video_1.avi
- elife_poa_e47732_Figure_2_figure_supplement_6.tif
- elife_poa_e47732_Figure_3_figure_supplement_1.tif
- elife_poa_e47732_Transparent_Reporting_File.pdf
- elife_poa_e47732_Figure_5_figure_supplement_1.tif
- elife_poa_e47732_Figure_2_figure_supplement_5.tif
- elife_poa_e47732_Figure_2_figure_supplement_4.tif
- elife_poa_e47732_Figure_8_figure_supplement_1.tif
- elife_poa_e47732_Figure_4_video_2.avi
- elife_poa_e47732_Figure_7_figure_supplement_1.tif
