# Supplementary figures and images for: Light-dependent single-cell heterogeneity in the chloroplast redox state regulates cell fate in a marine diatom
Source: eLife journal article supplement (doi:10.7554/elife.47732), 2019-06-24

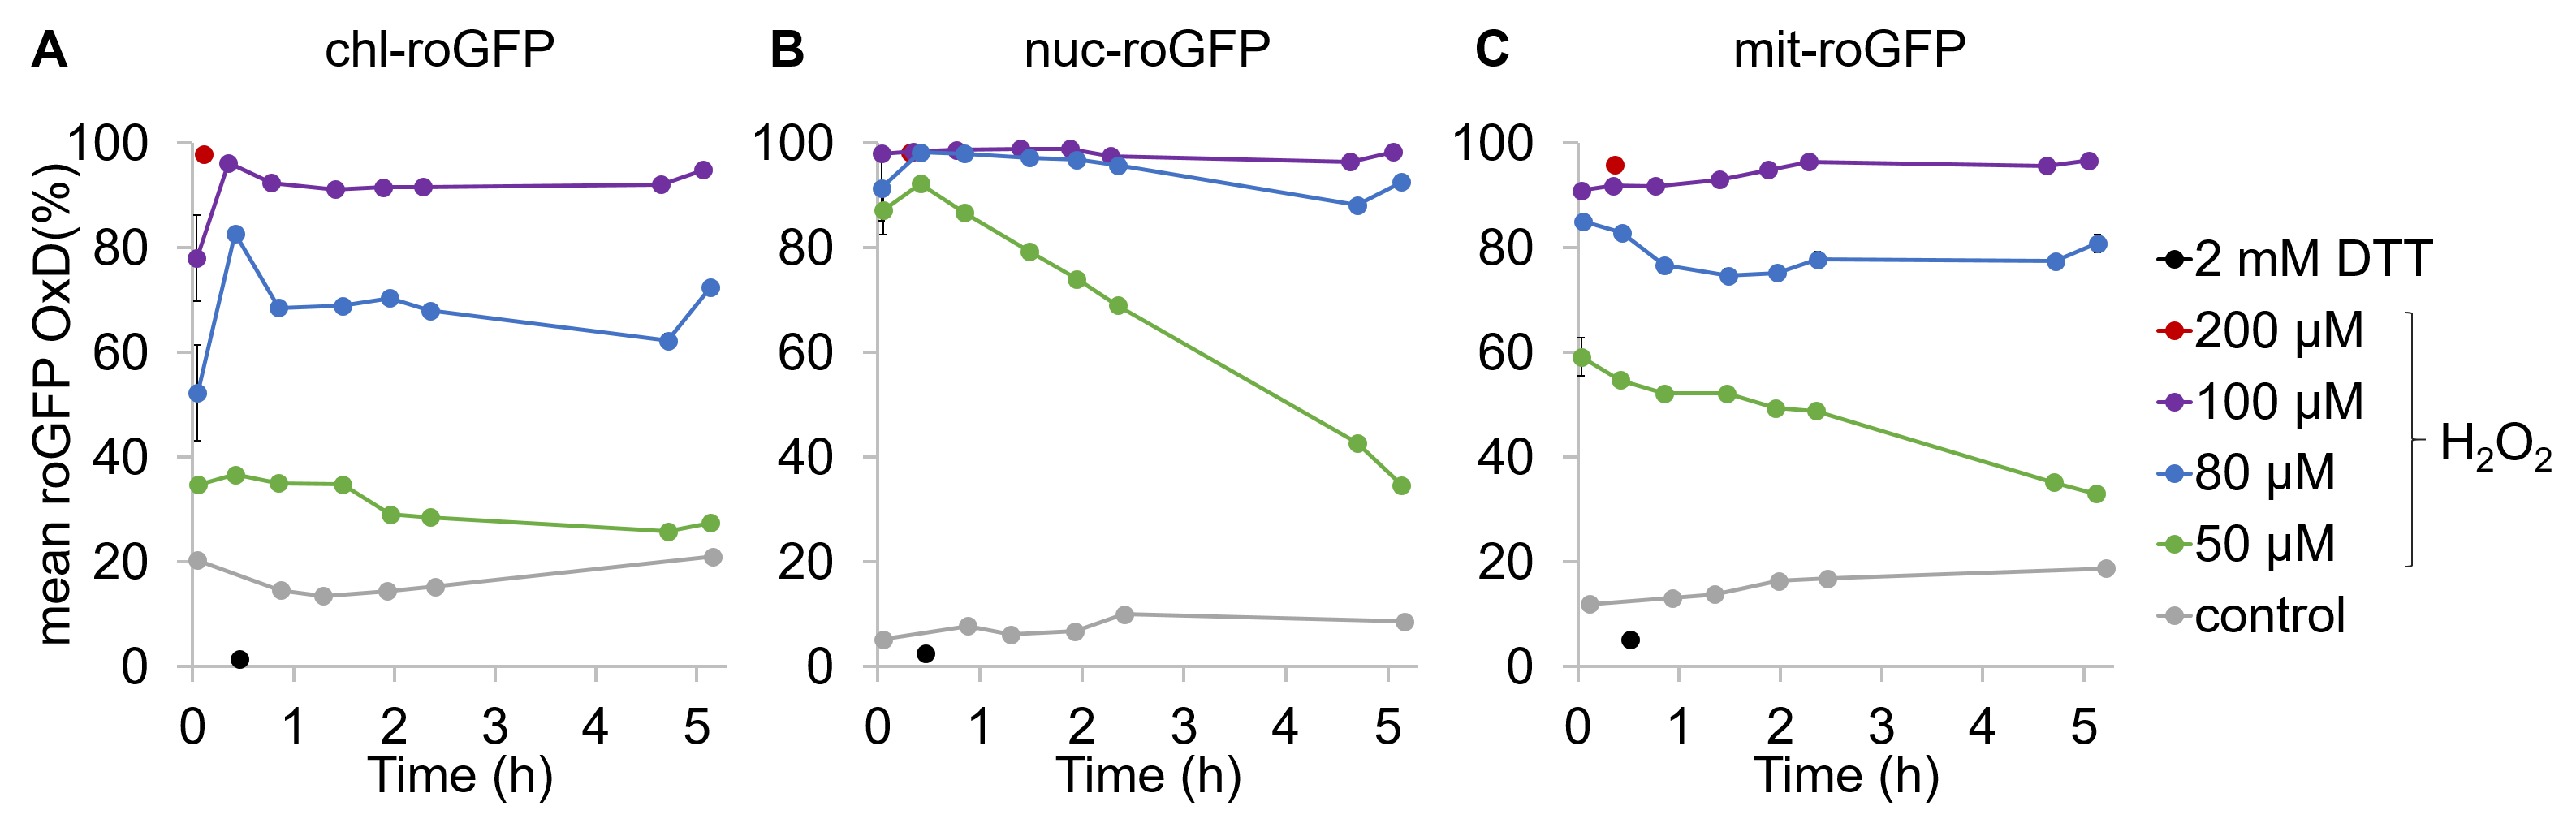

Supplement: supp [file elife-47732-supp-v1.zip › elife_poa_e47732_Figure_2_figure_supplement_1.tif]

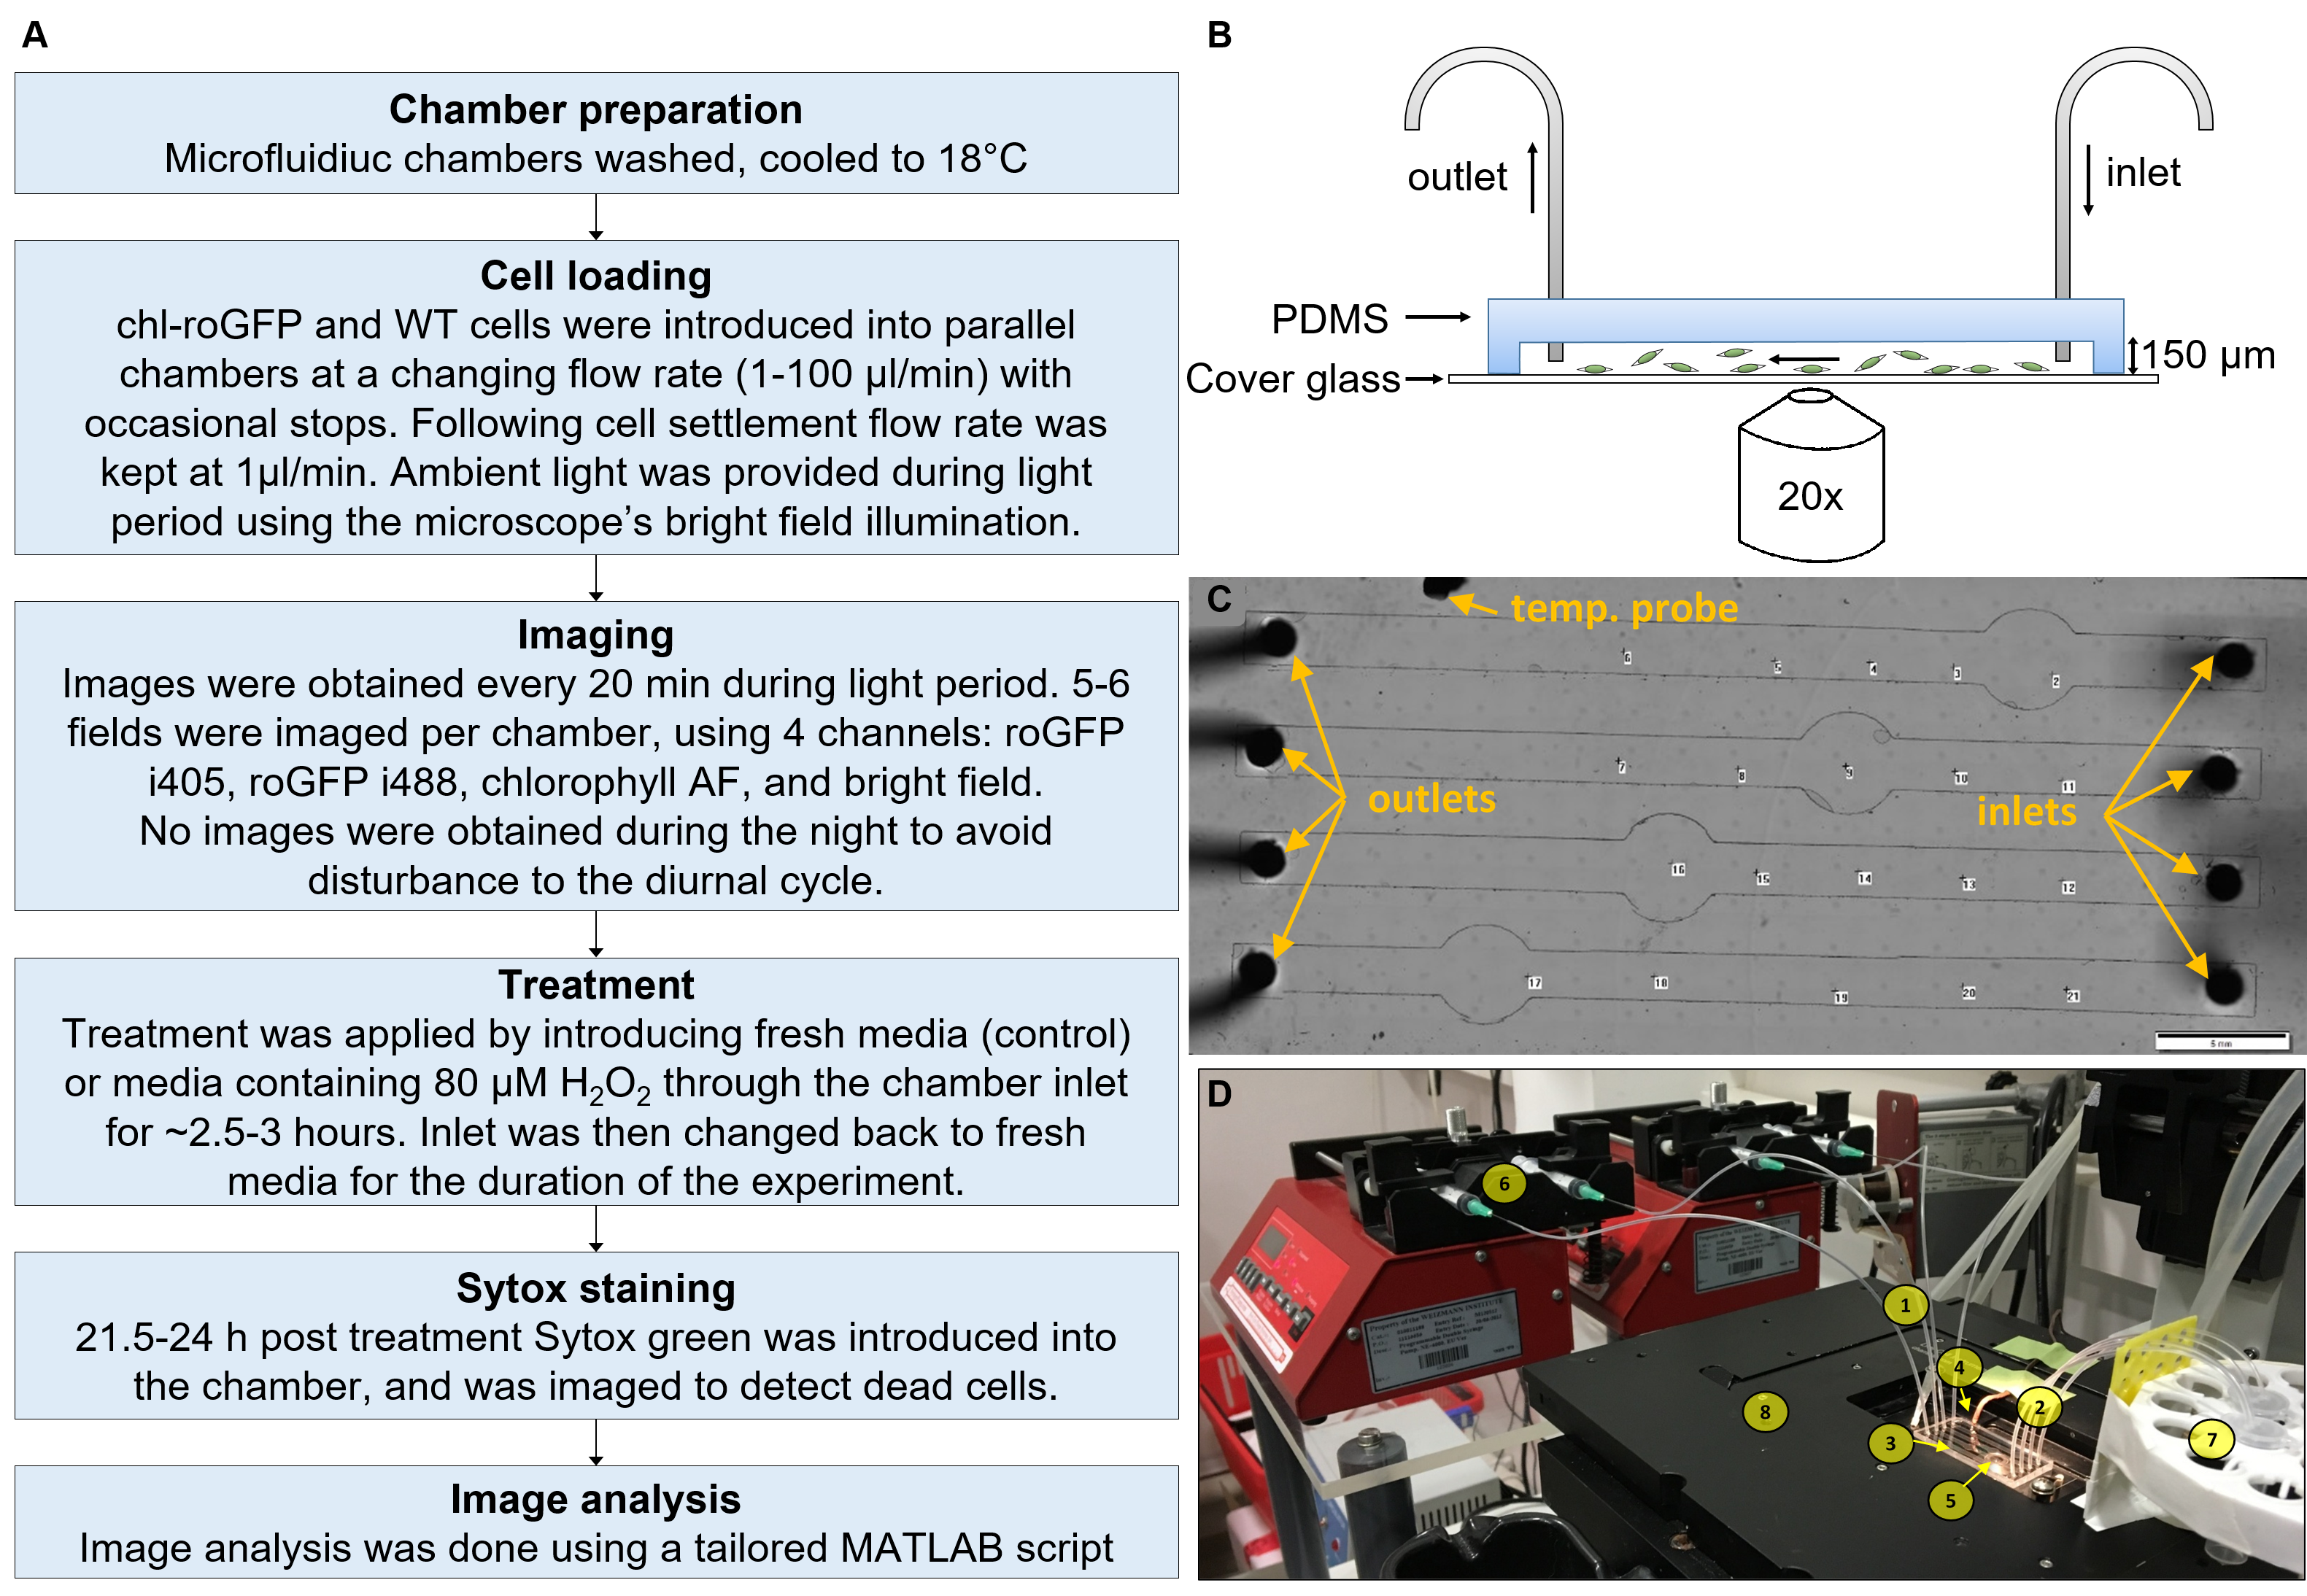

Supplement: supp [file elife-47732-supp-v1.zip › elife_poa_e47732_Figure_4_figure_supplement_1.tif]

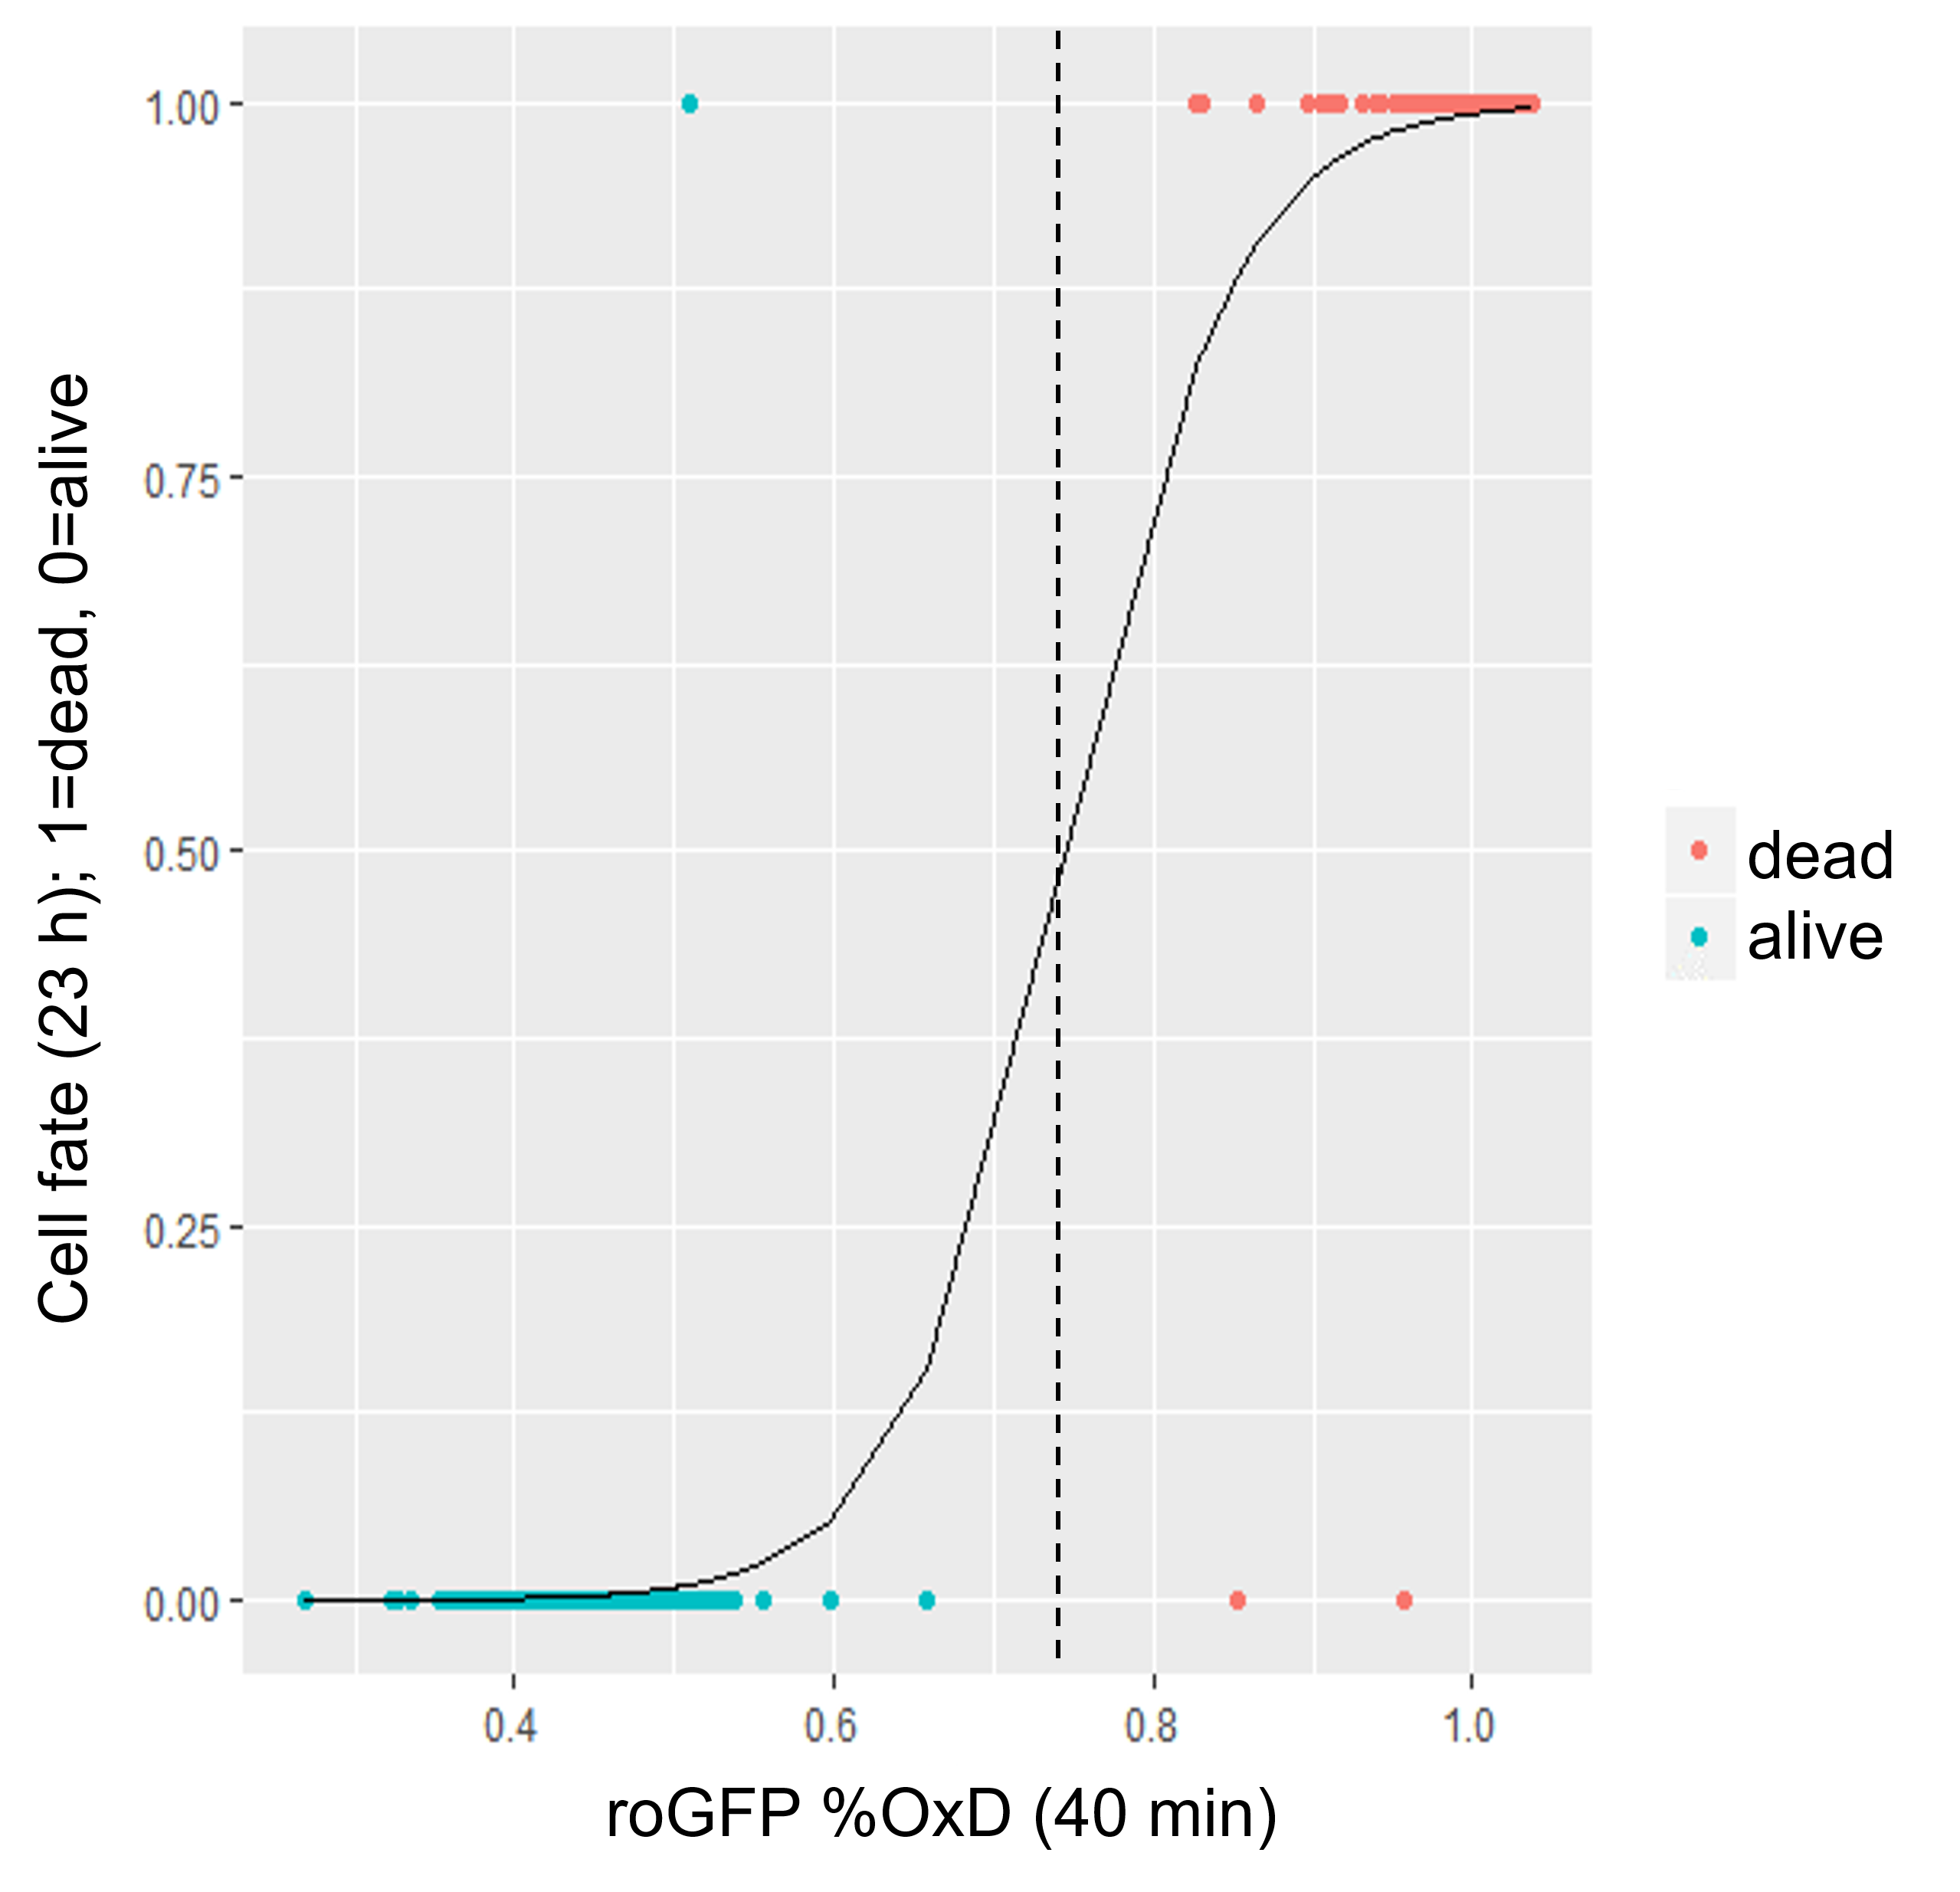

Supplement: supp [file elife-47732-supp-v1.zip › elife_poa_e47732_Figure_4_figure_supplement_3.tif]

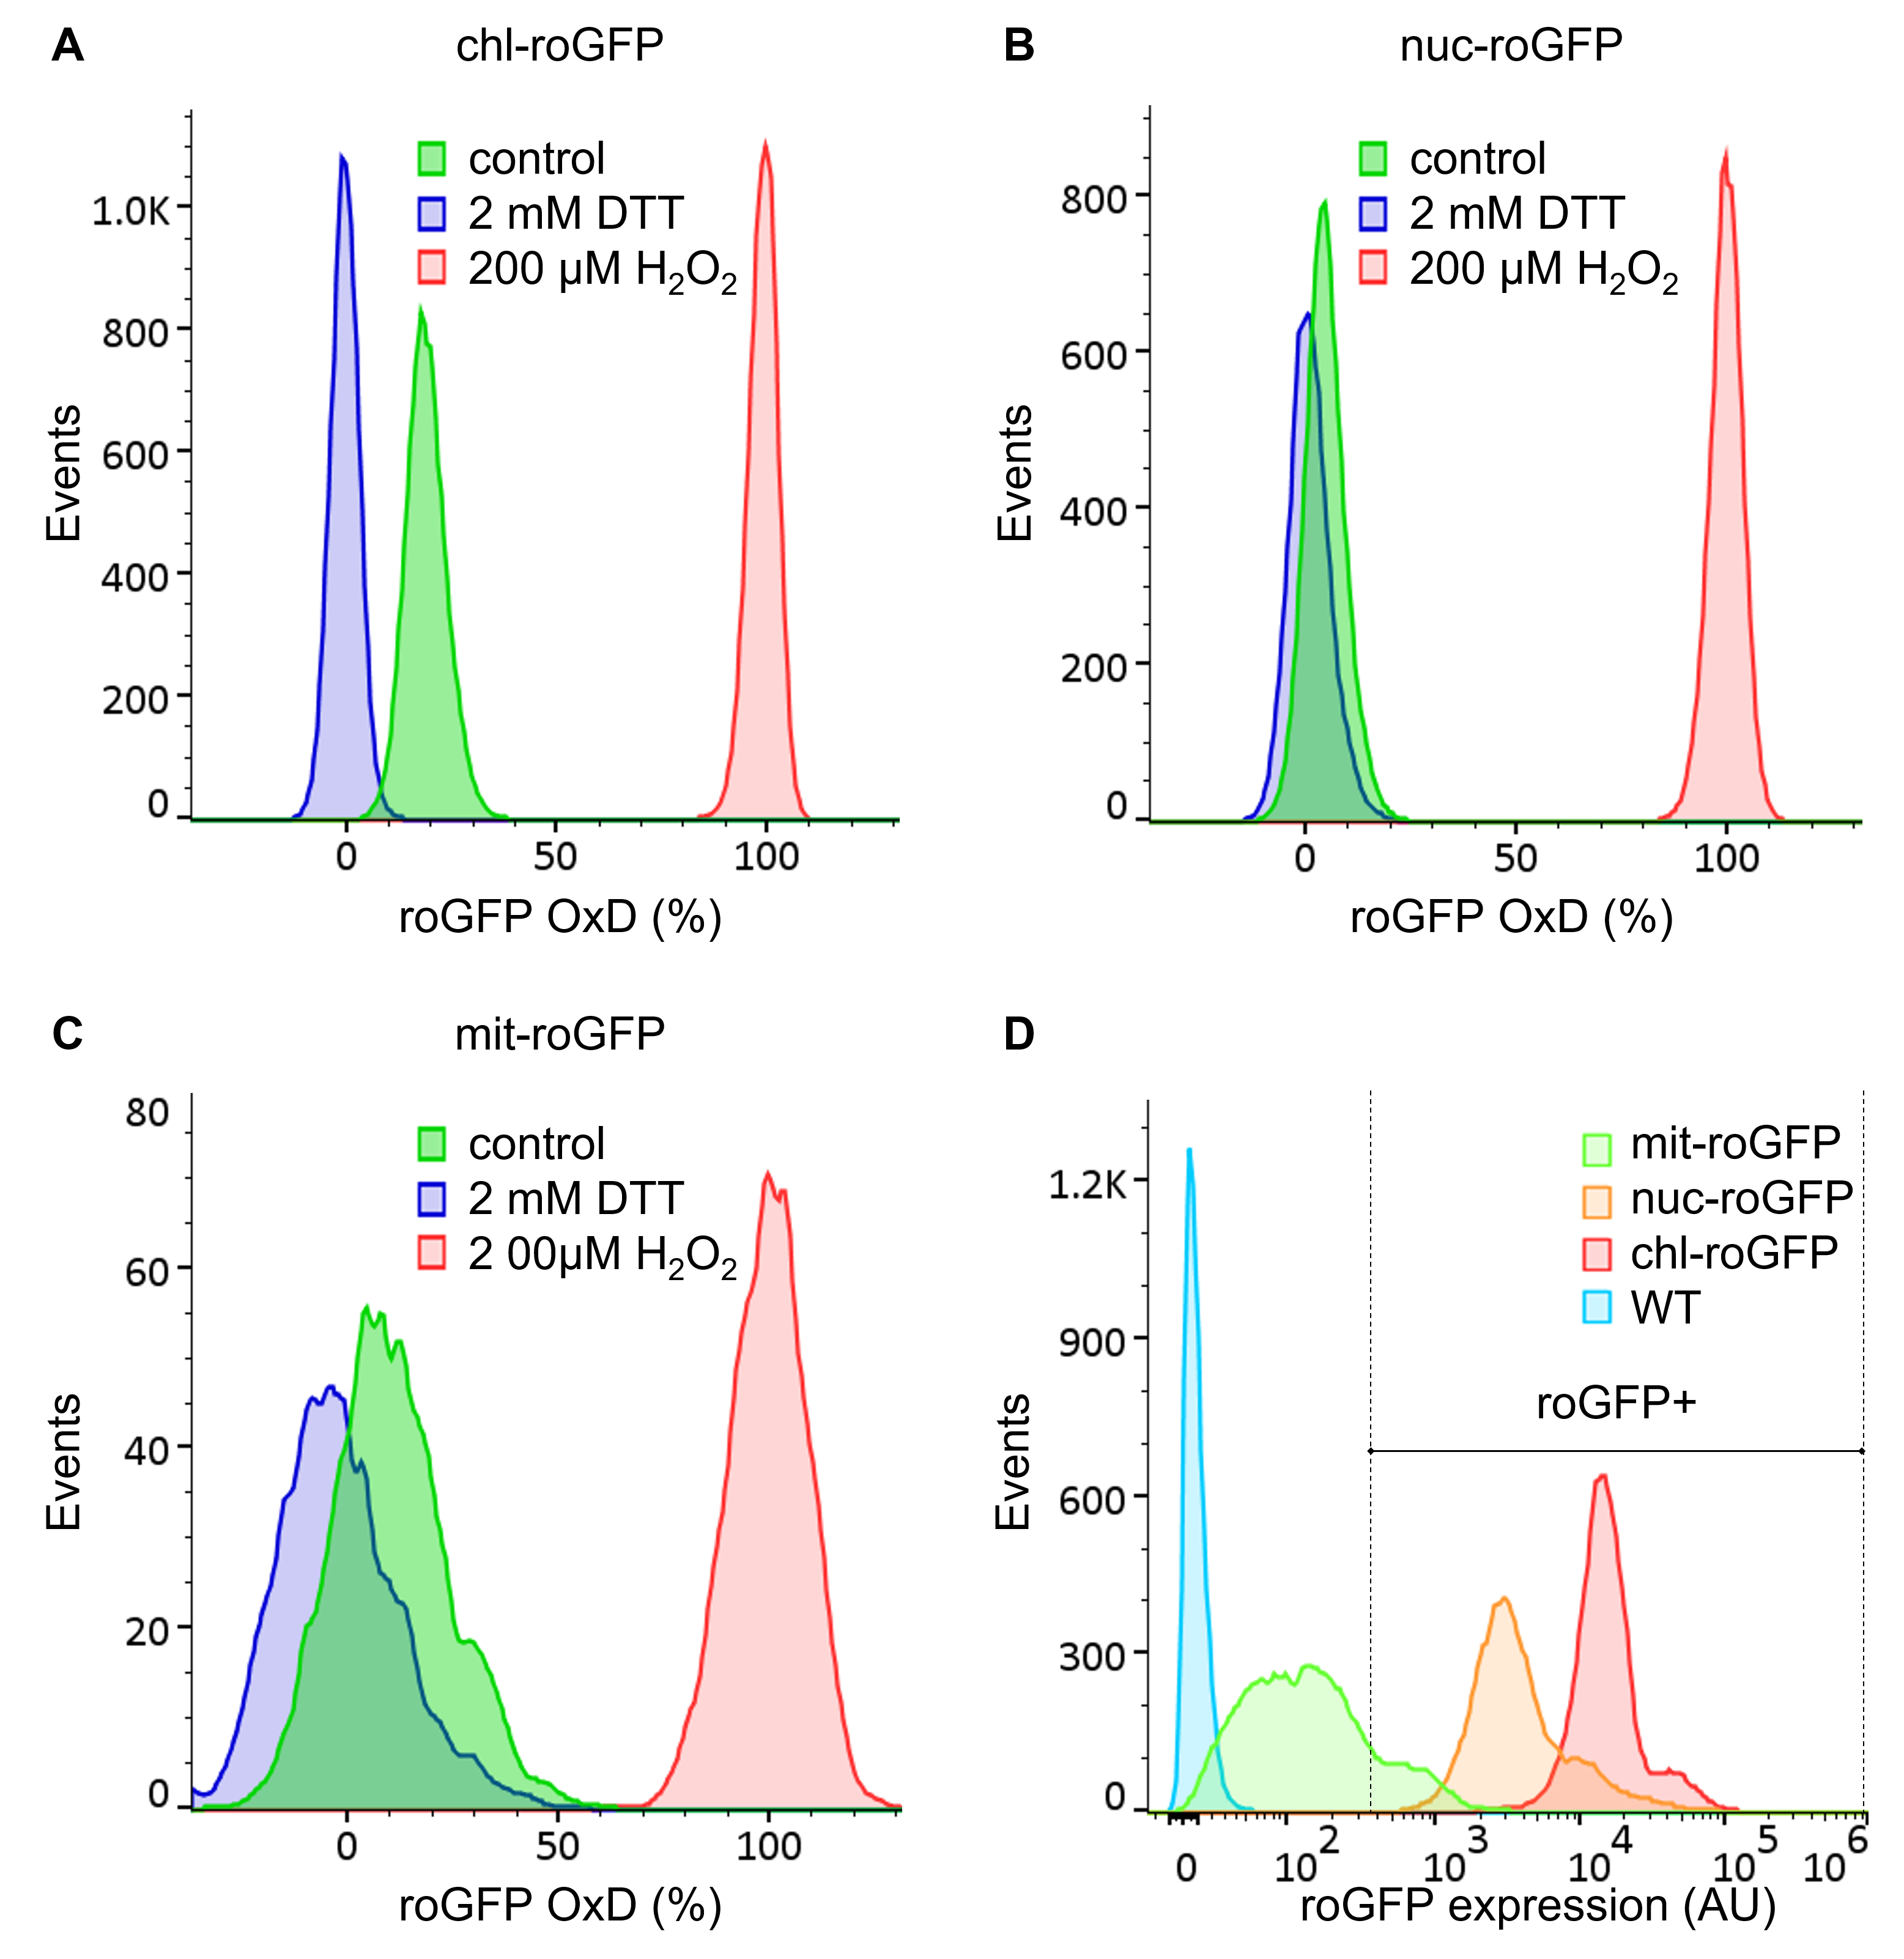

Supplement: supp [file elife-47732-supp-v1.zip › elife_poa_e47732_Figure_2_figure_supplement_2.tif]

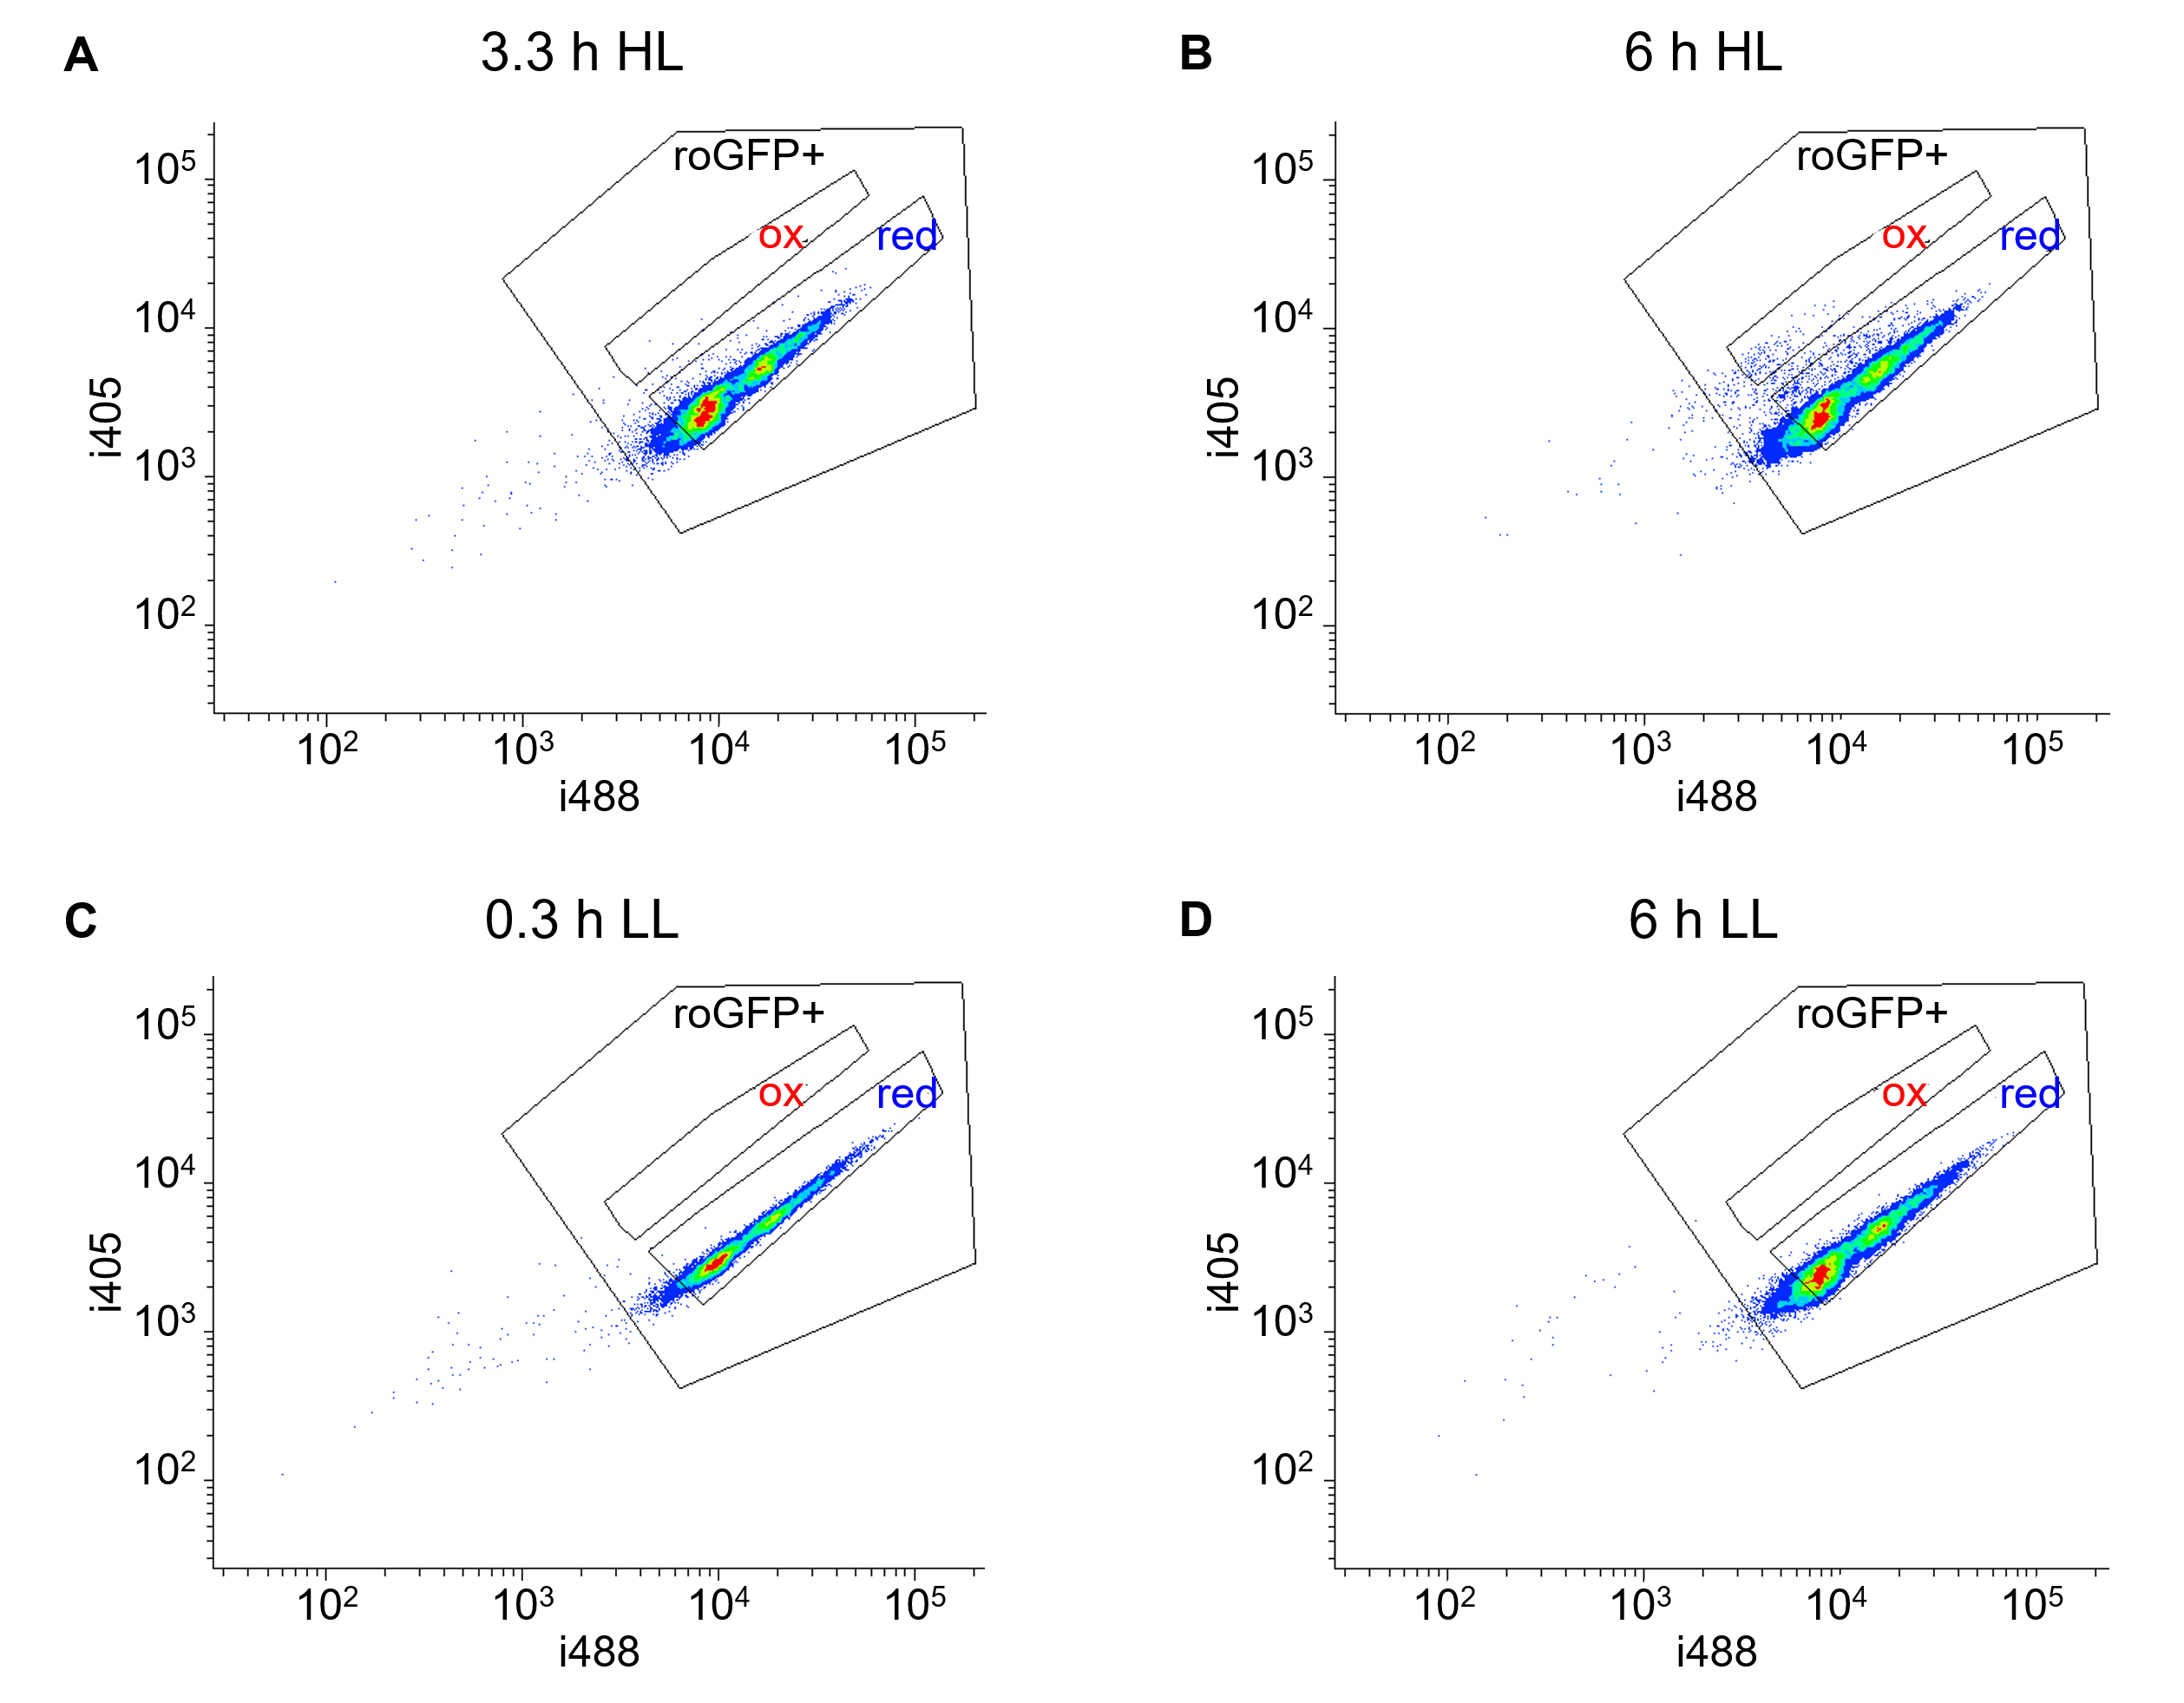

Supplement: supp [file elife-47732-supp-v1.zip › elife_poa_e47732_Figure_8_figure_supplement_2.tif]

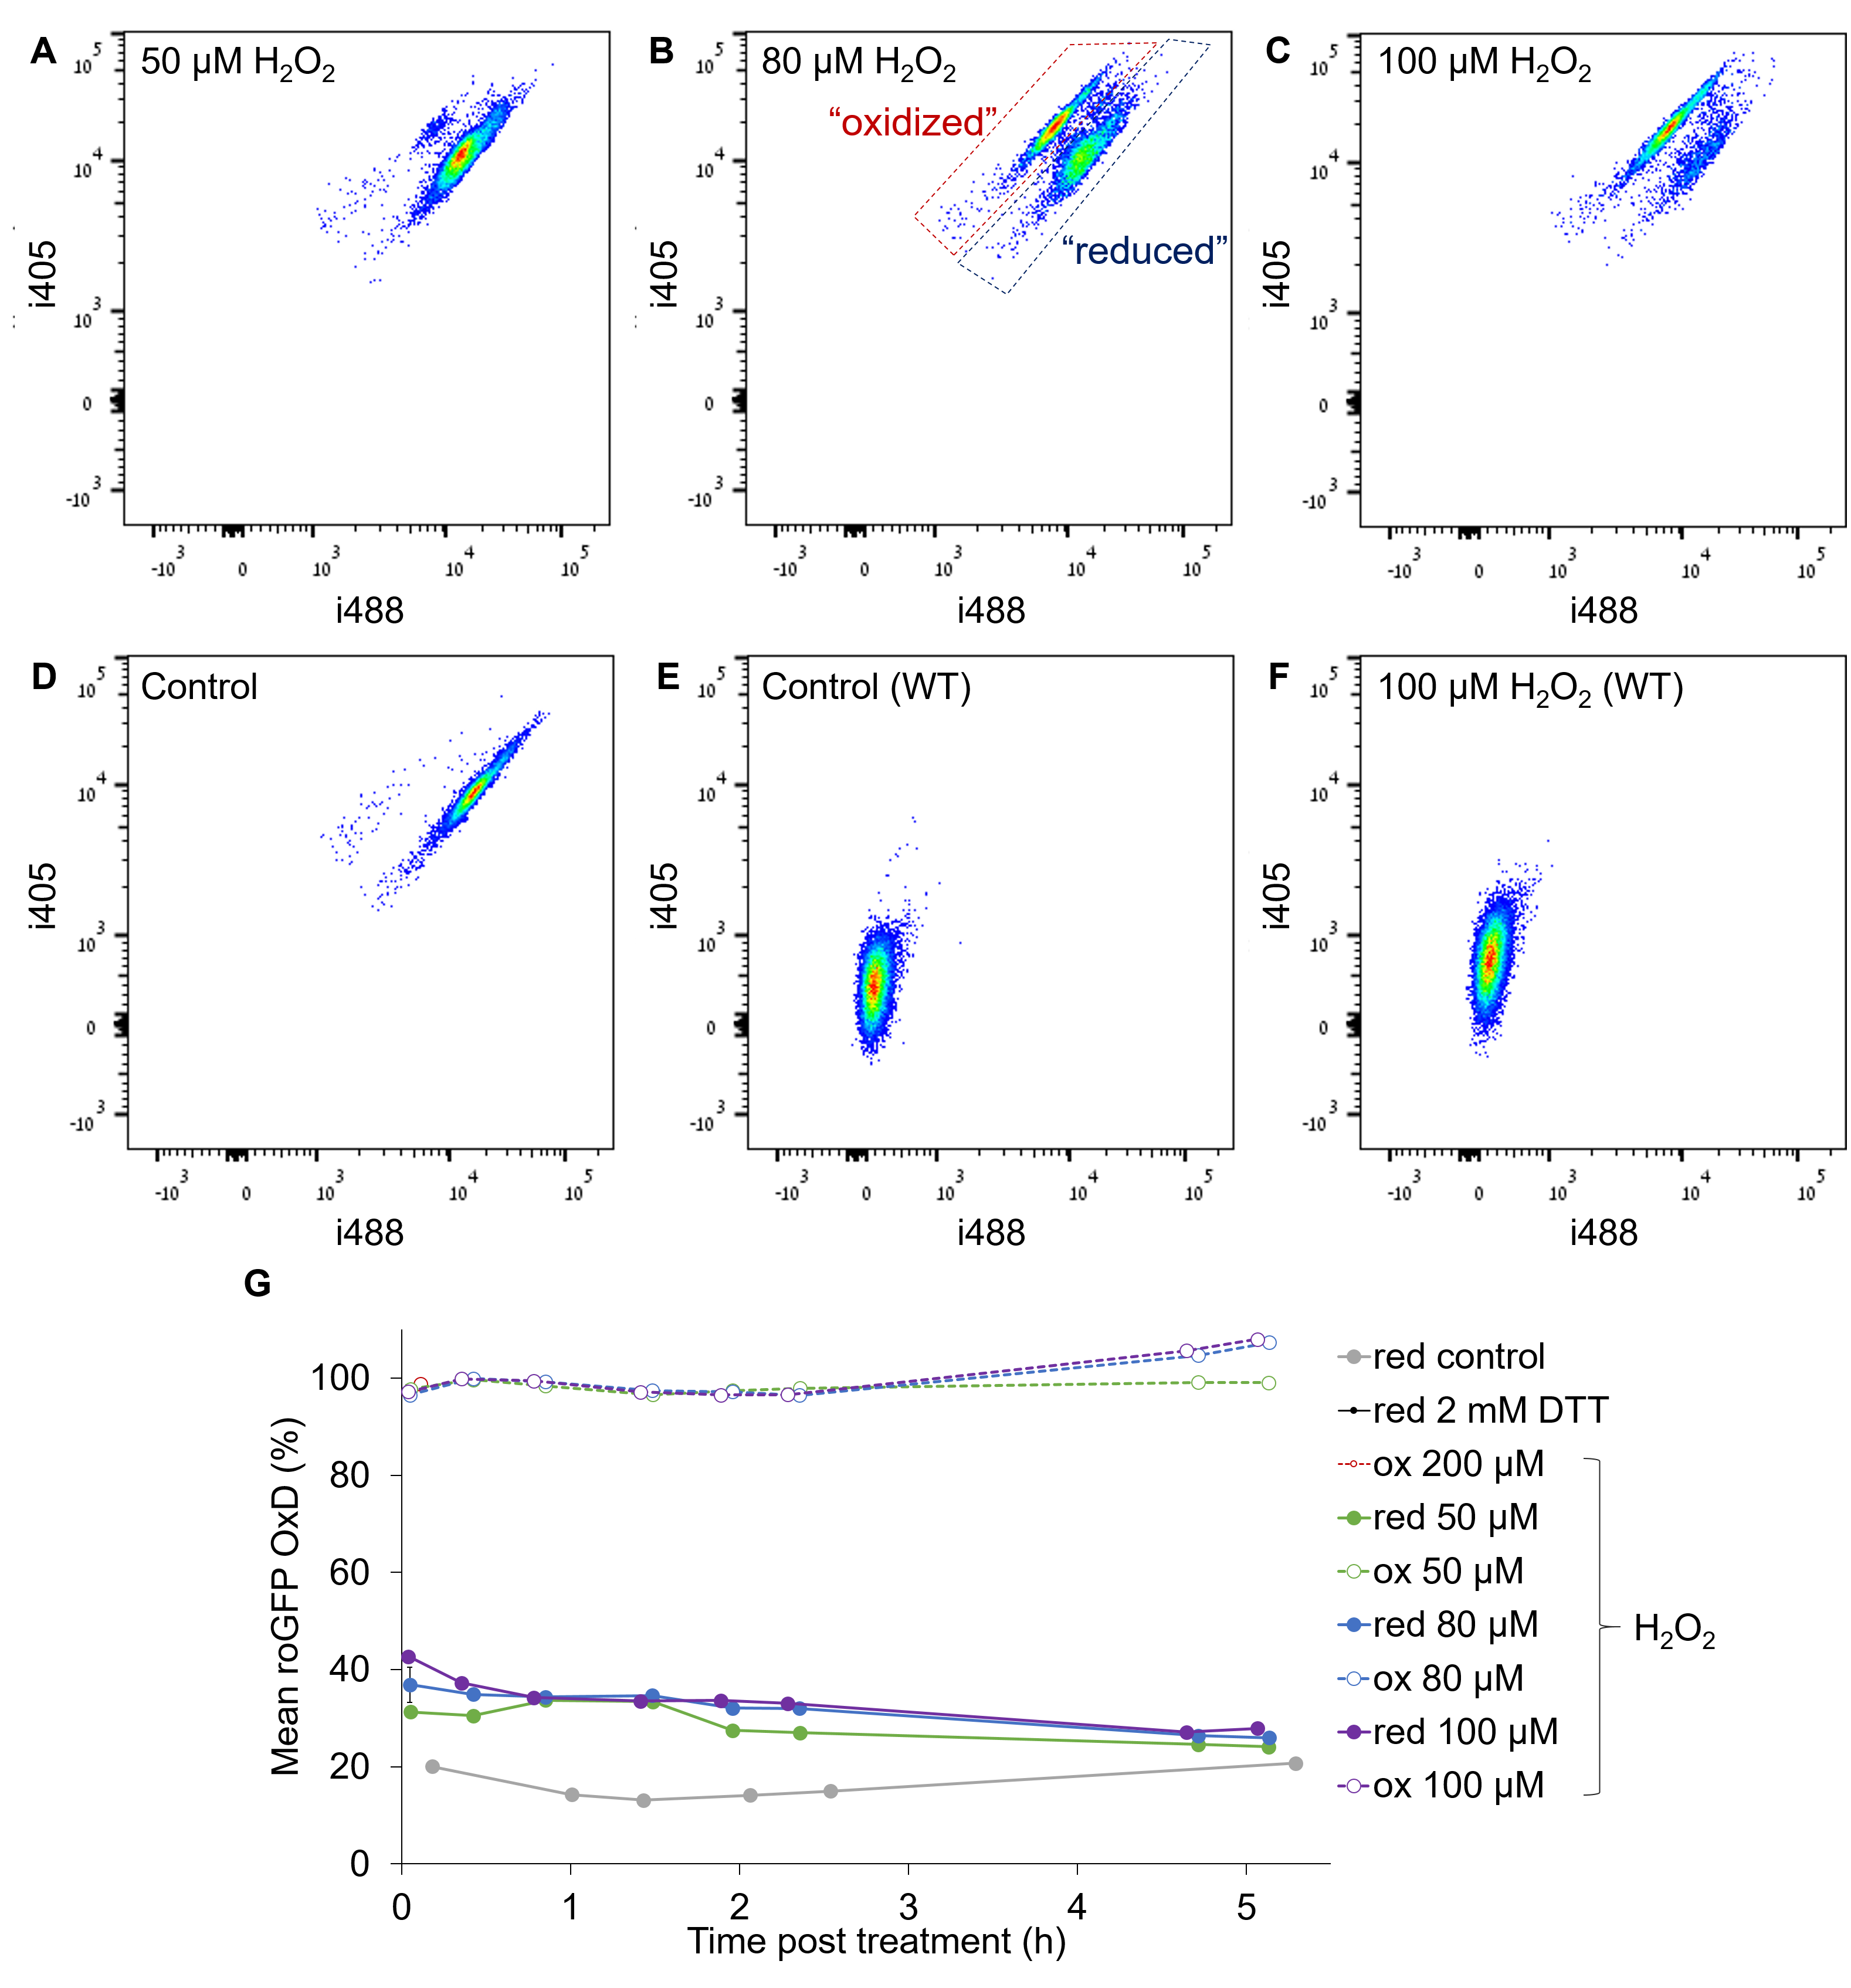

Supplement: supp [file elife-47732-supp-v1.zip › elife_poa_e47732_Figure_2_figure_supplement_3.tif]

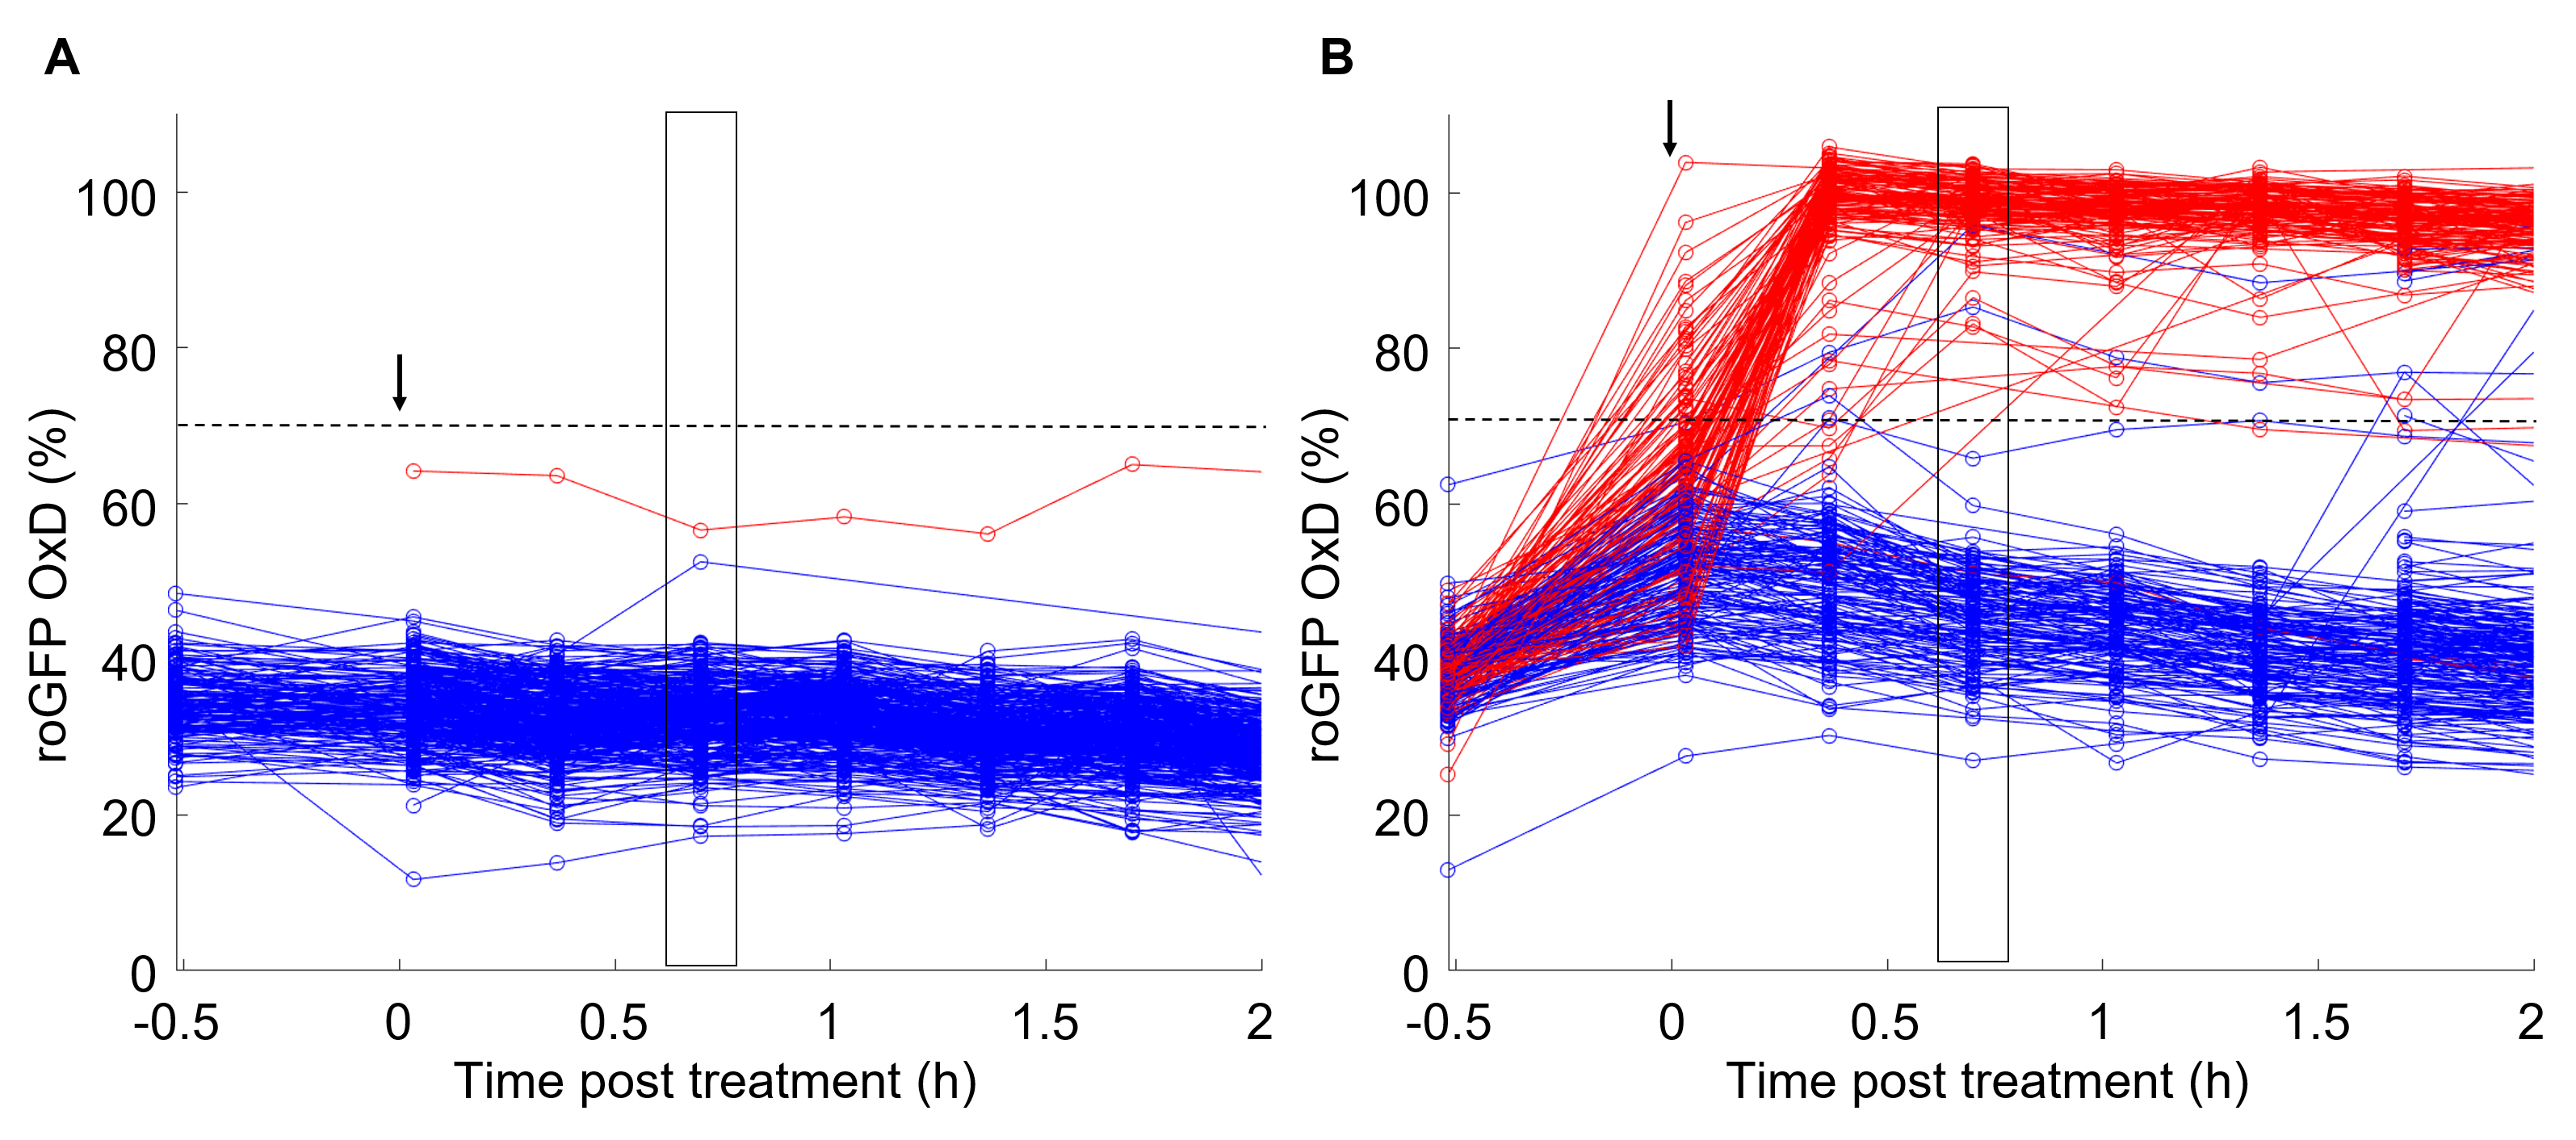

Supplement: supp [file elife-47732-supp-v1.zip › elife_poa_e47732_Figure_4_figure_supplement_2.tif]

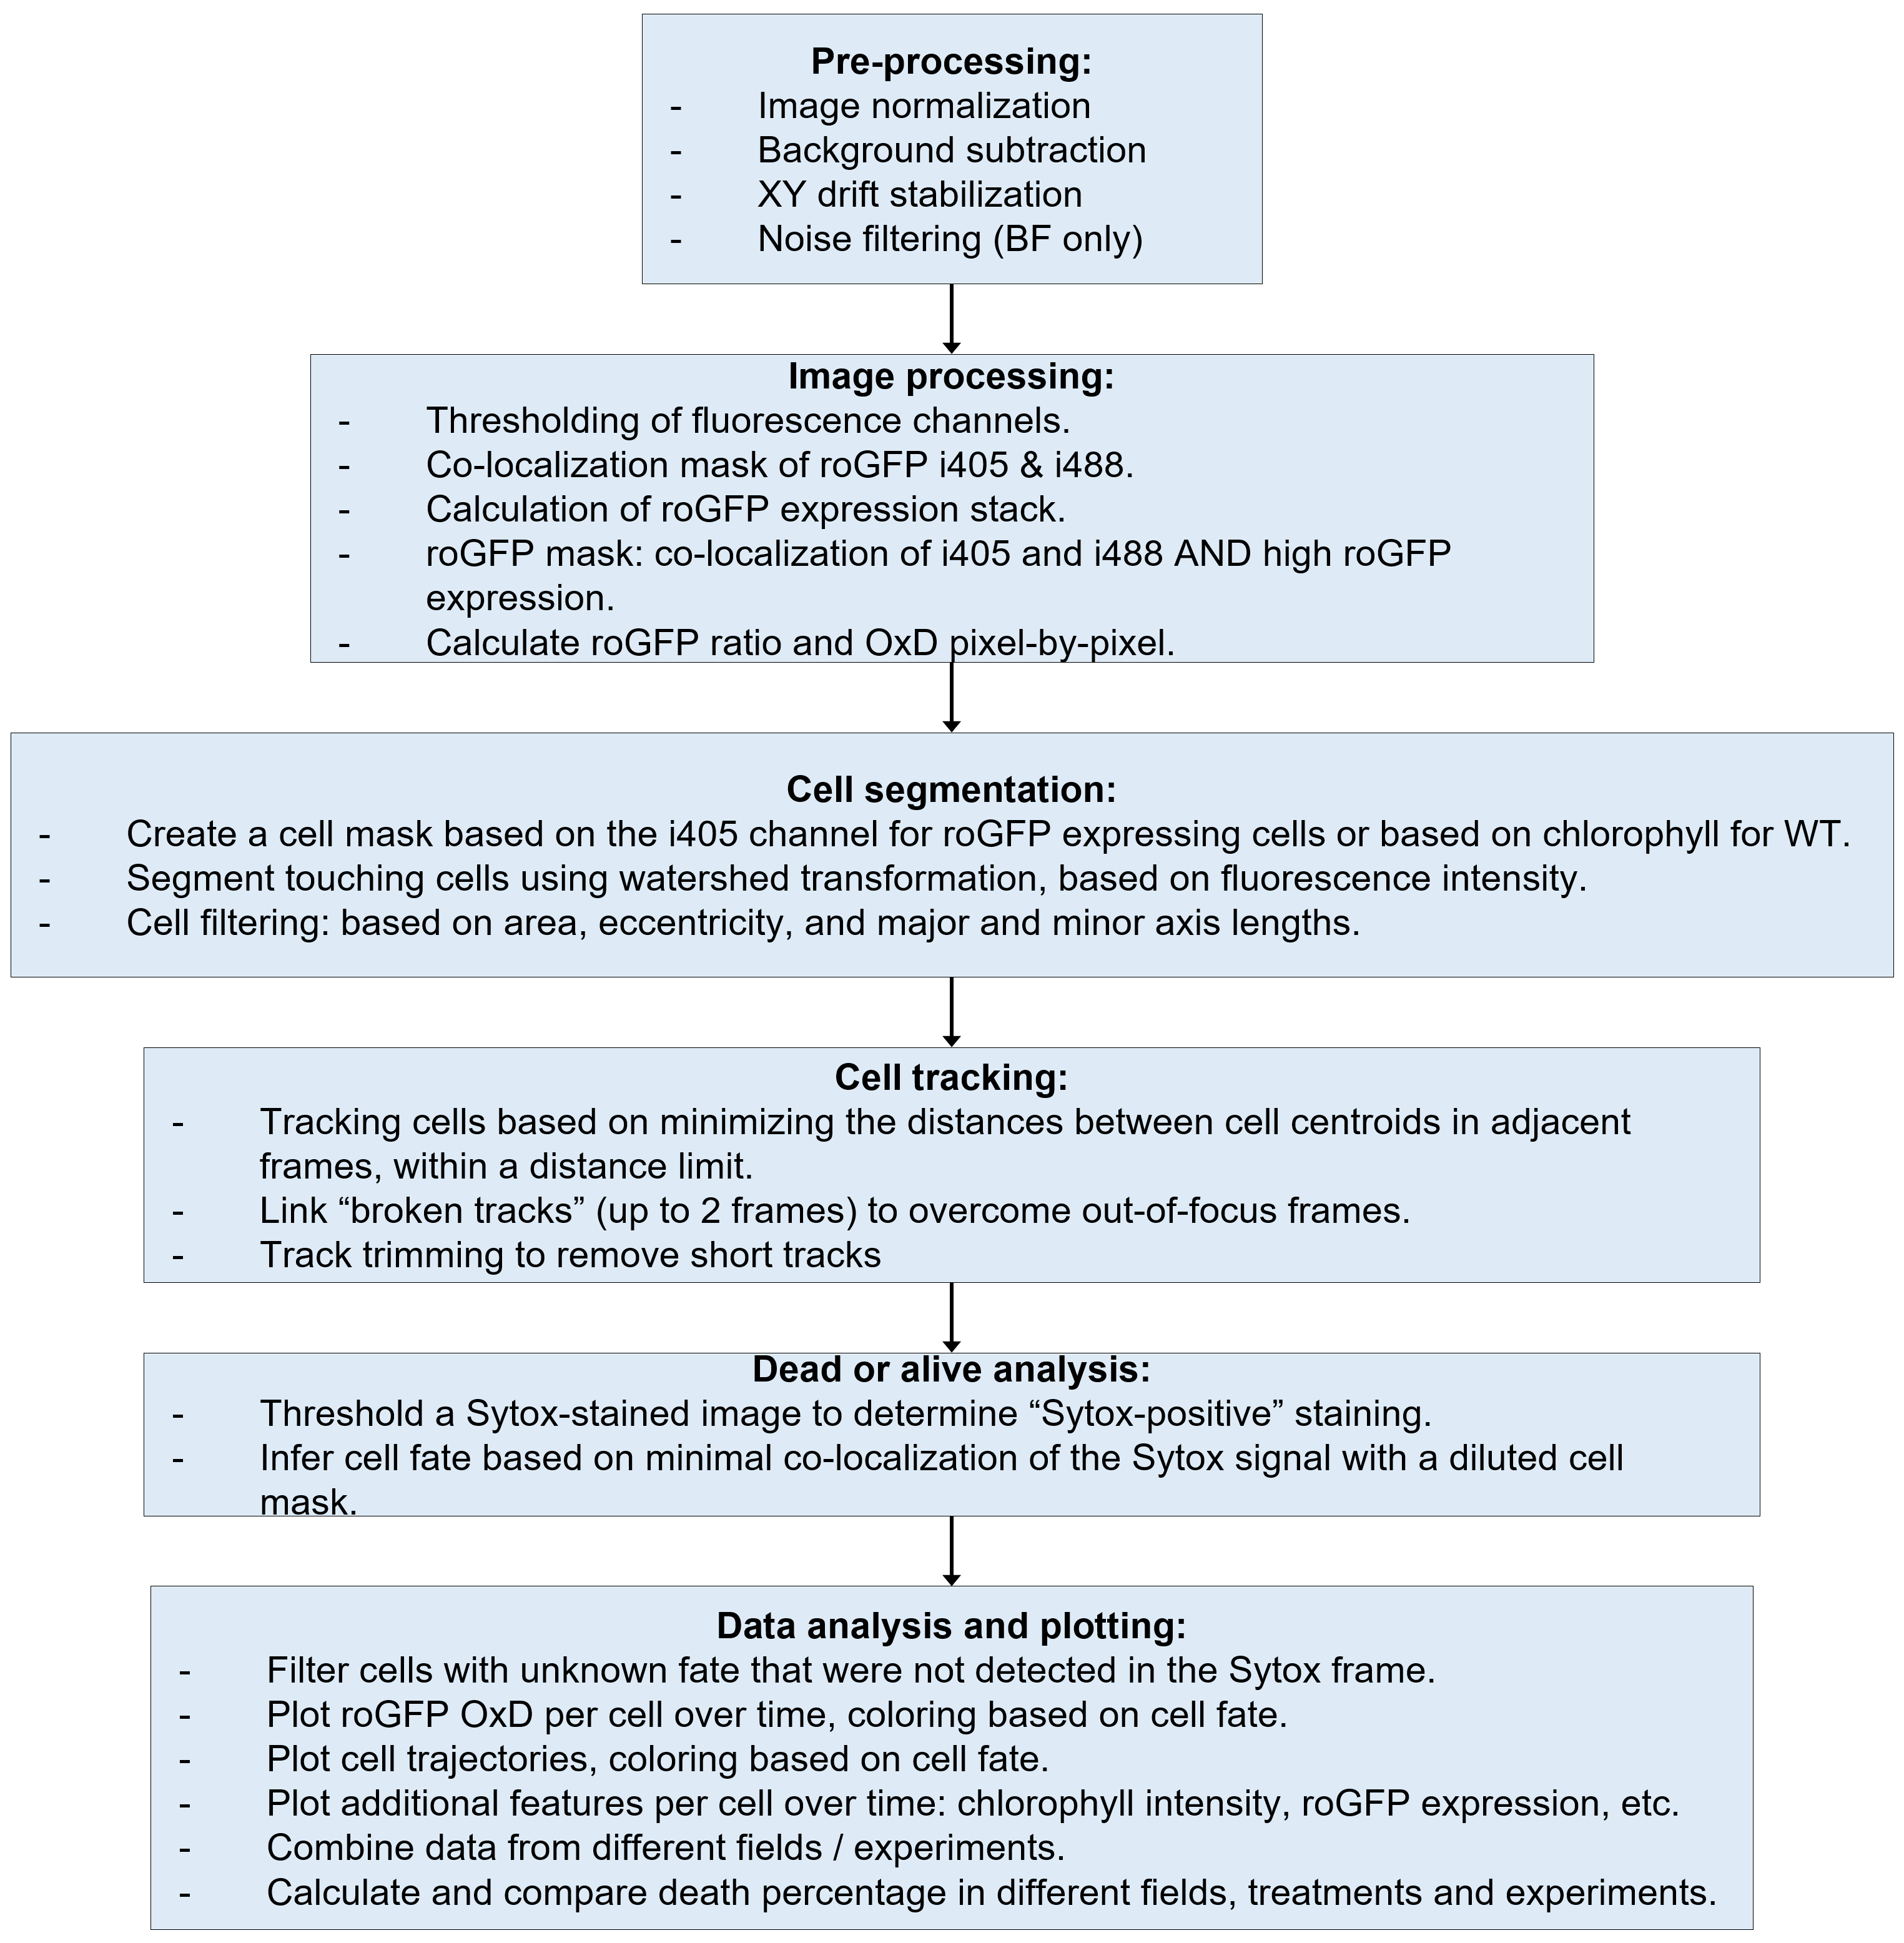

Supplement: supp [file elife-47732-supp-v1.zip › elife_poa_e47732_Figure_4_figure_supplement_4.tif]

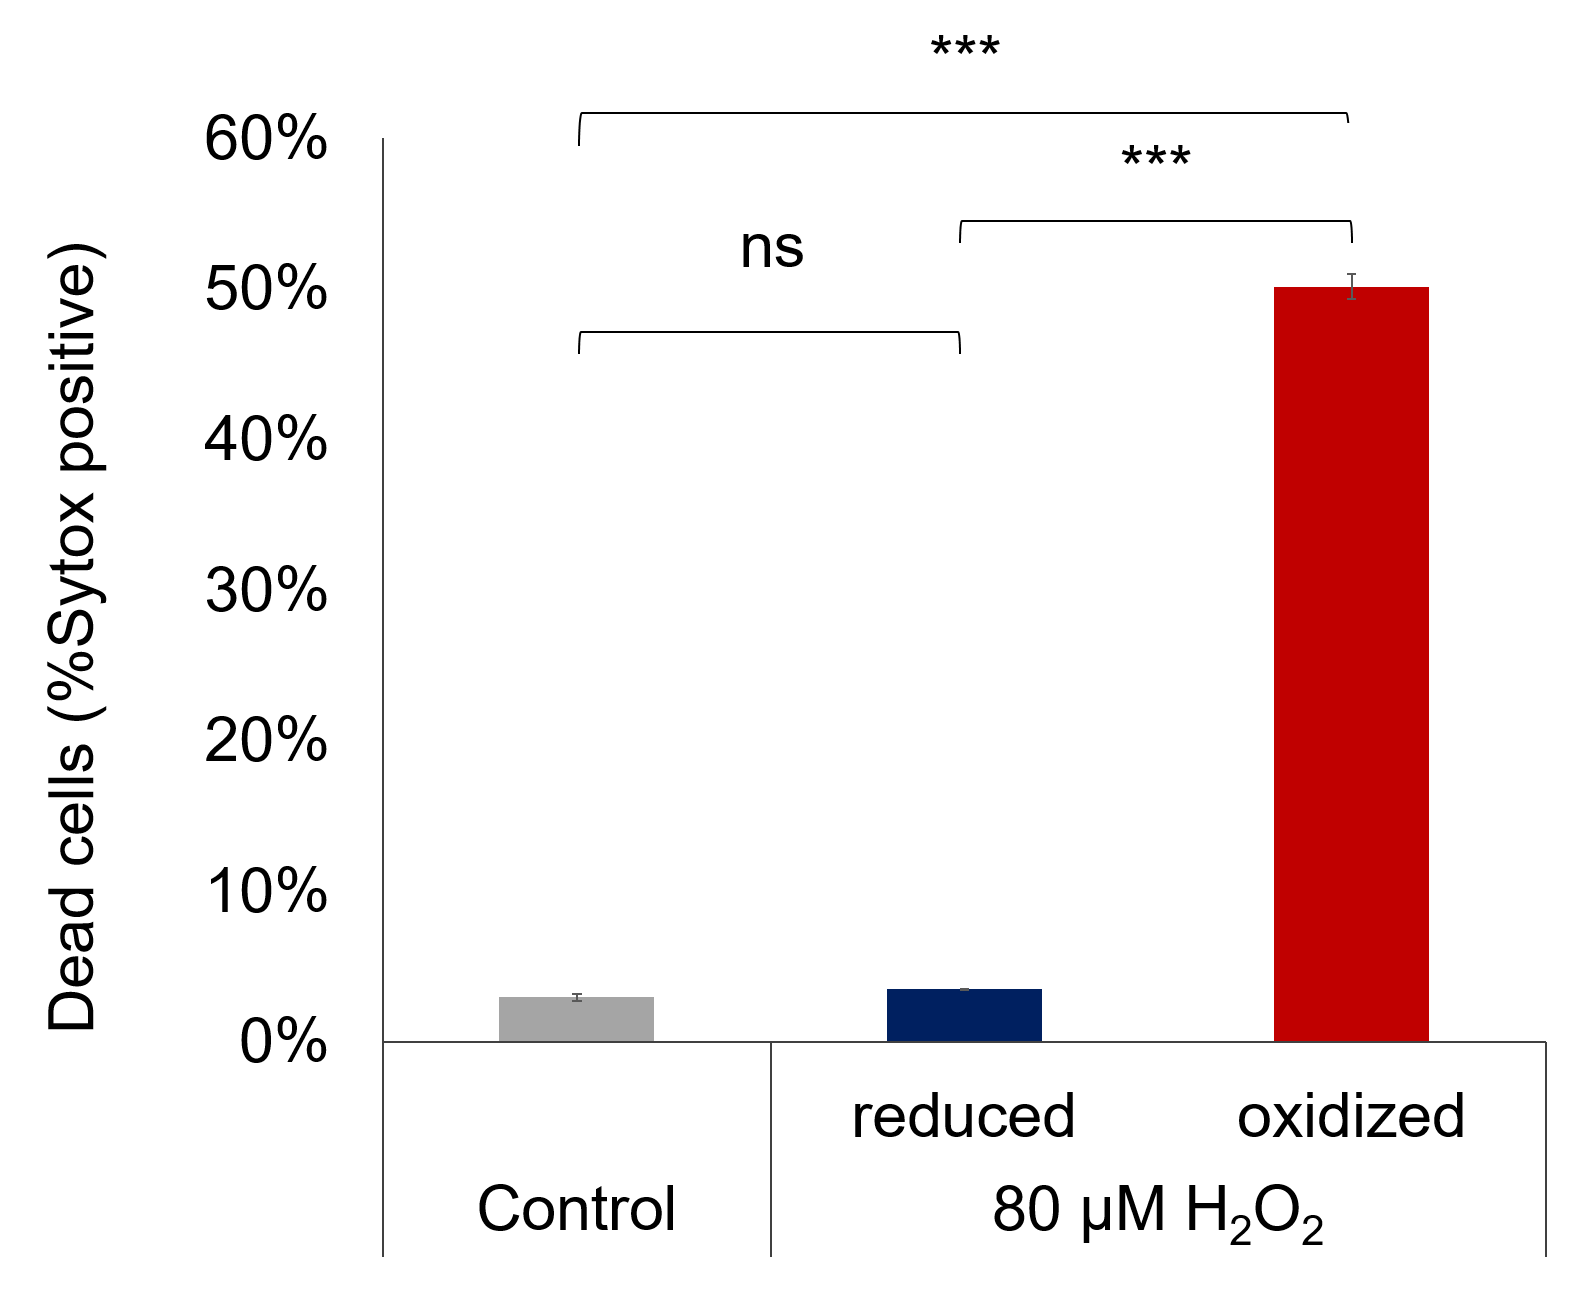

Supplement: supp [file elife-47732-supp-v1.zip › elife_poa_e47732_Figure_3_figure_supplement_2.tif]

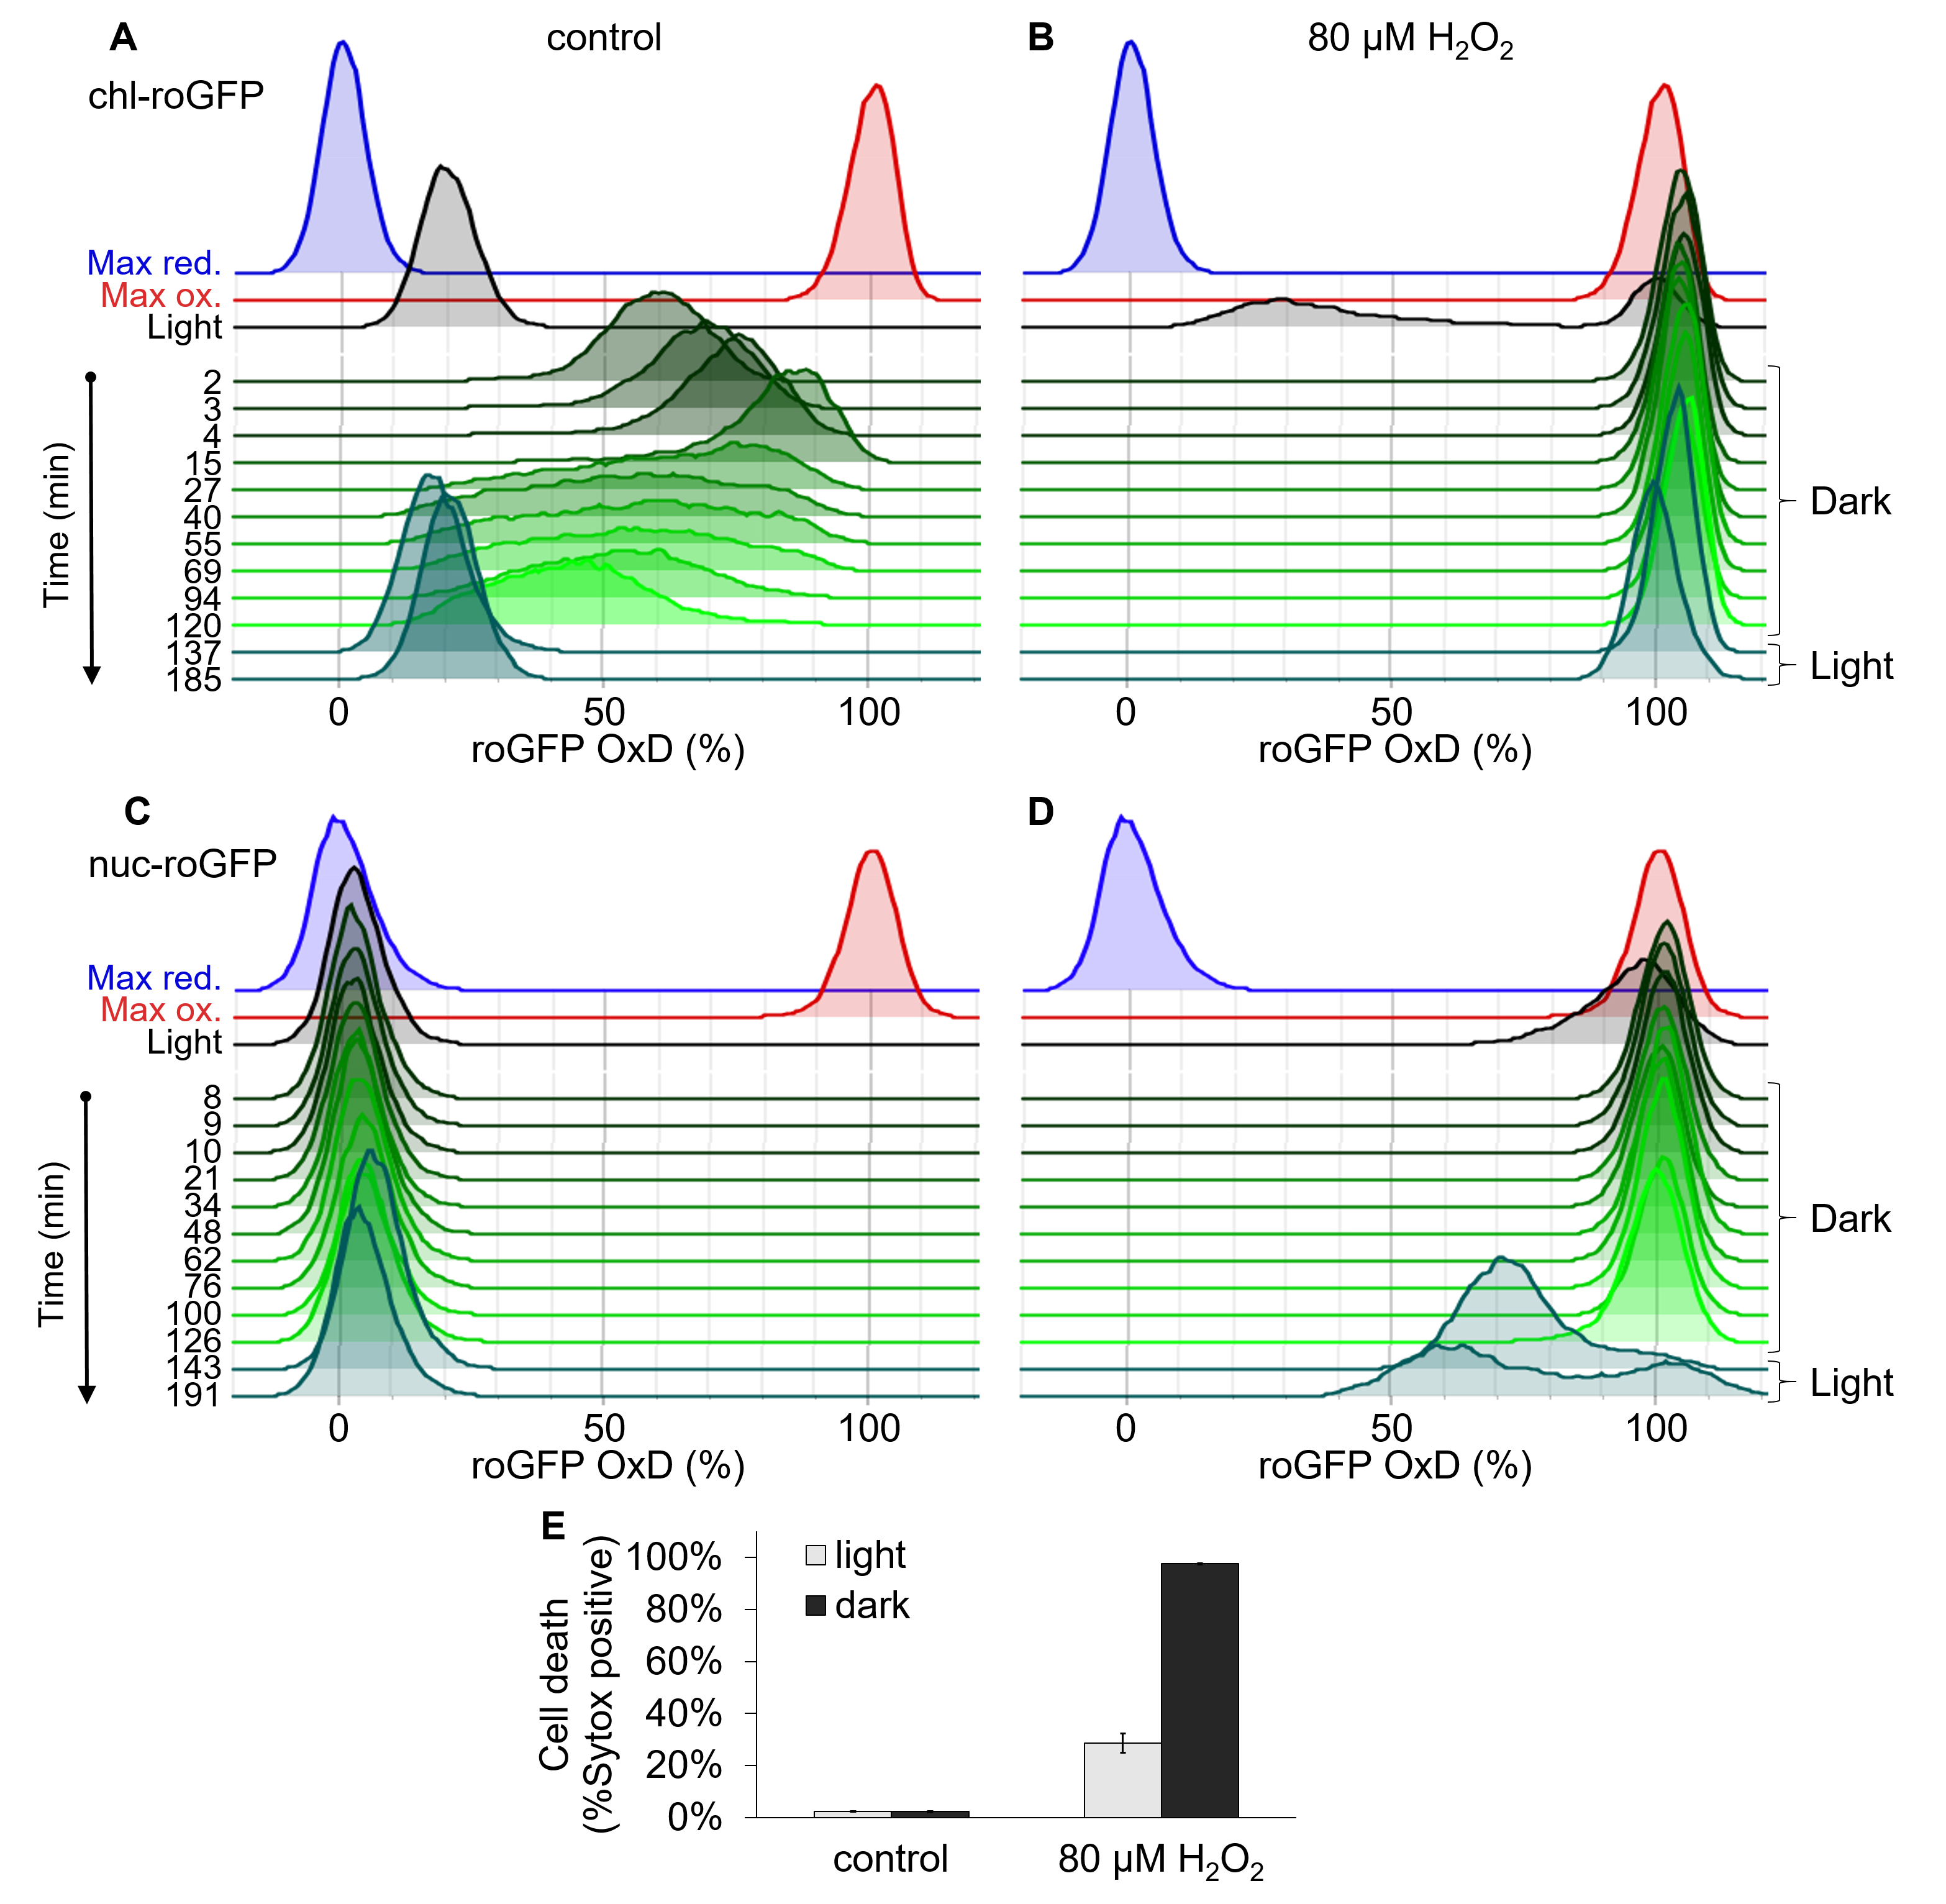

Supplement: supp [file elife-47732-supp-v1.zip › elife_poa_e47732_Figure_7_figure_supplement_2.tif]

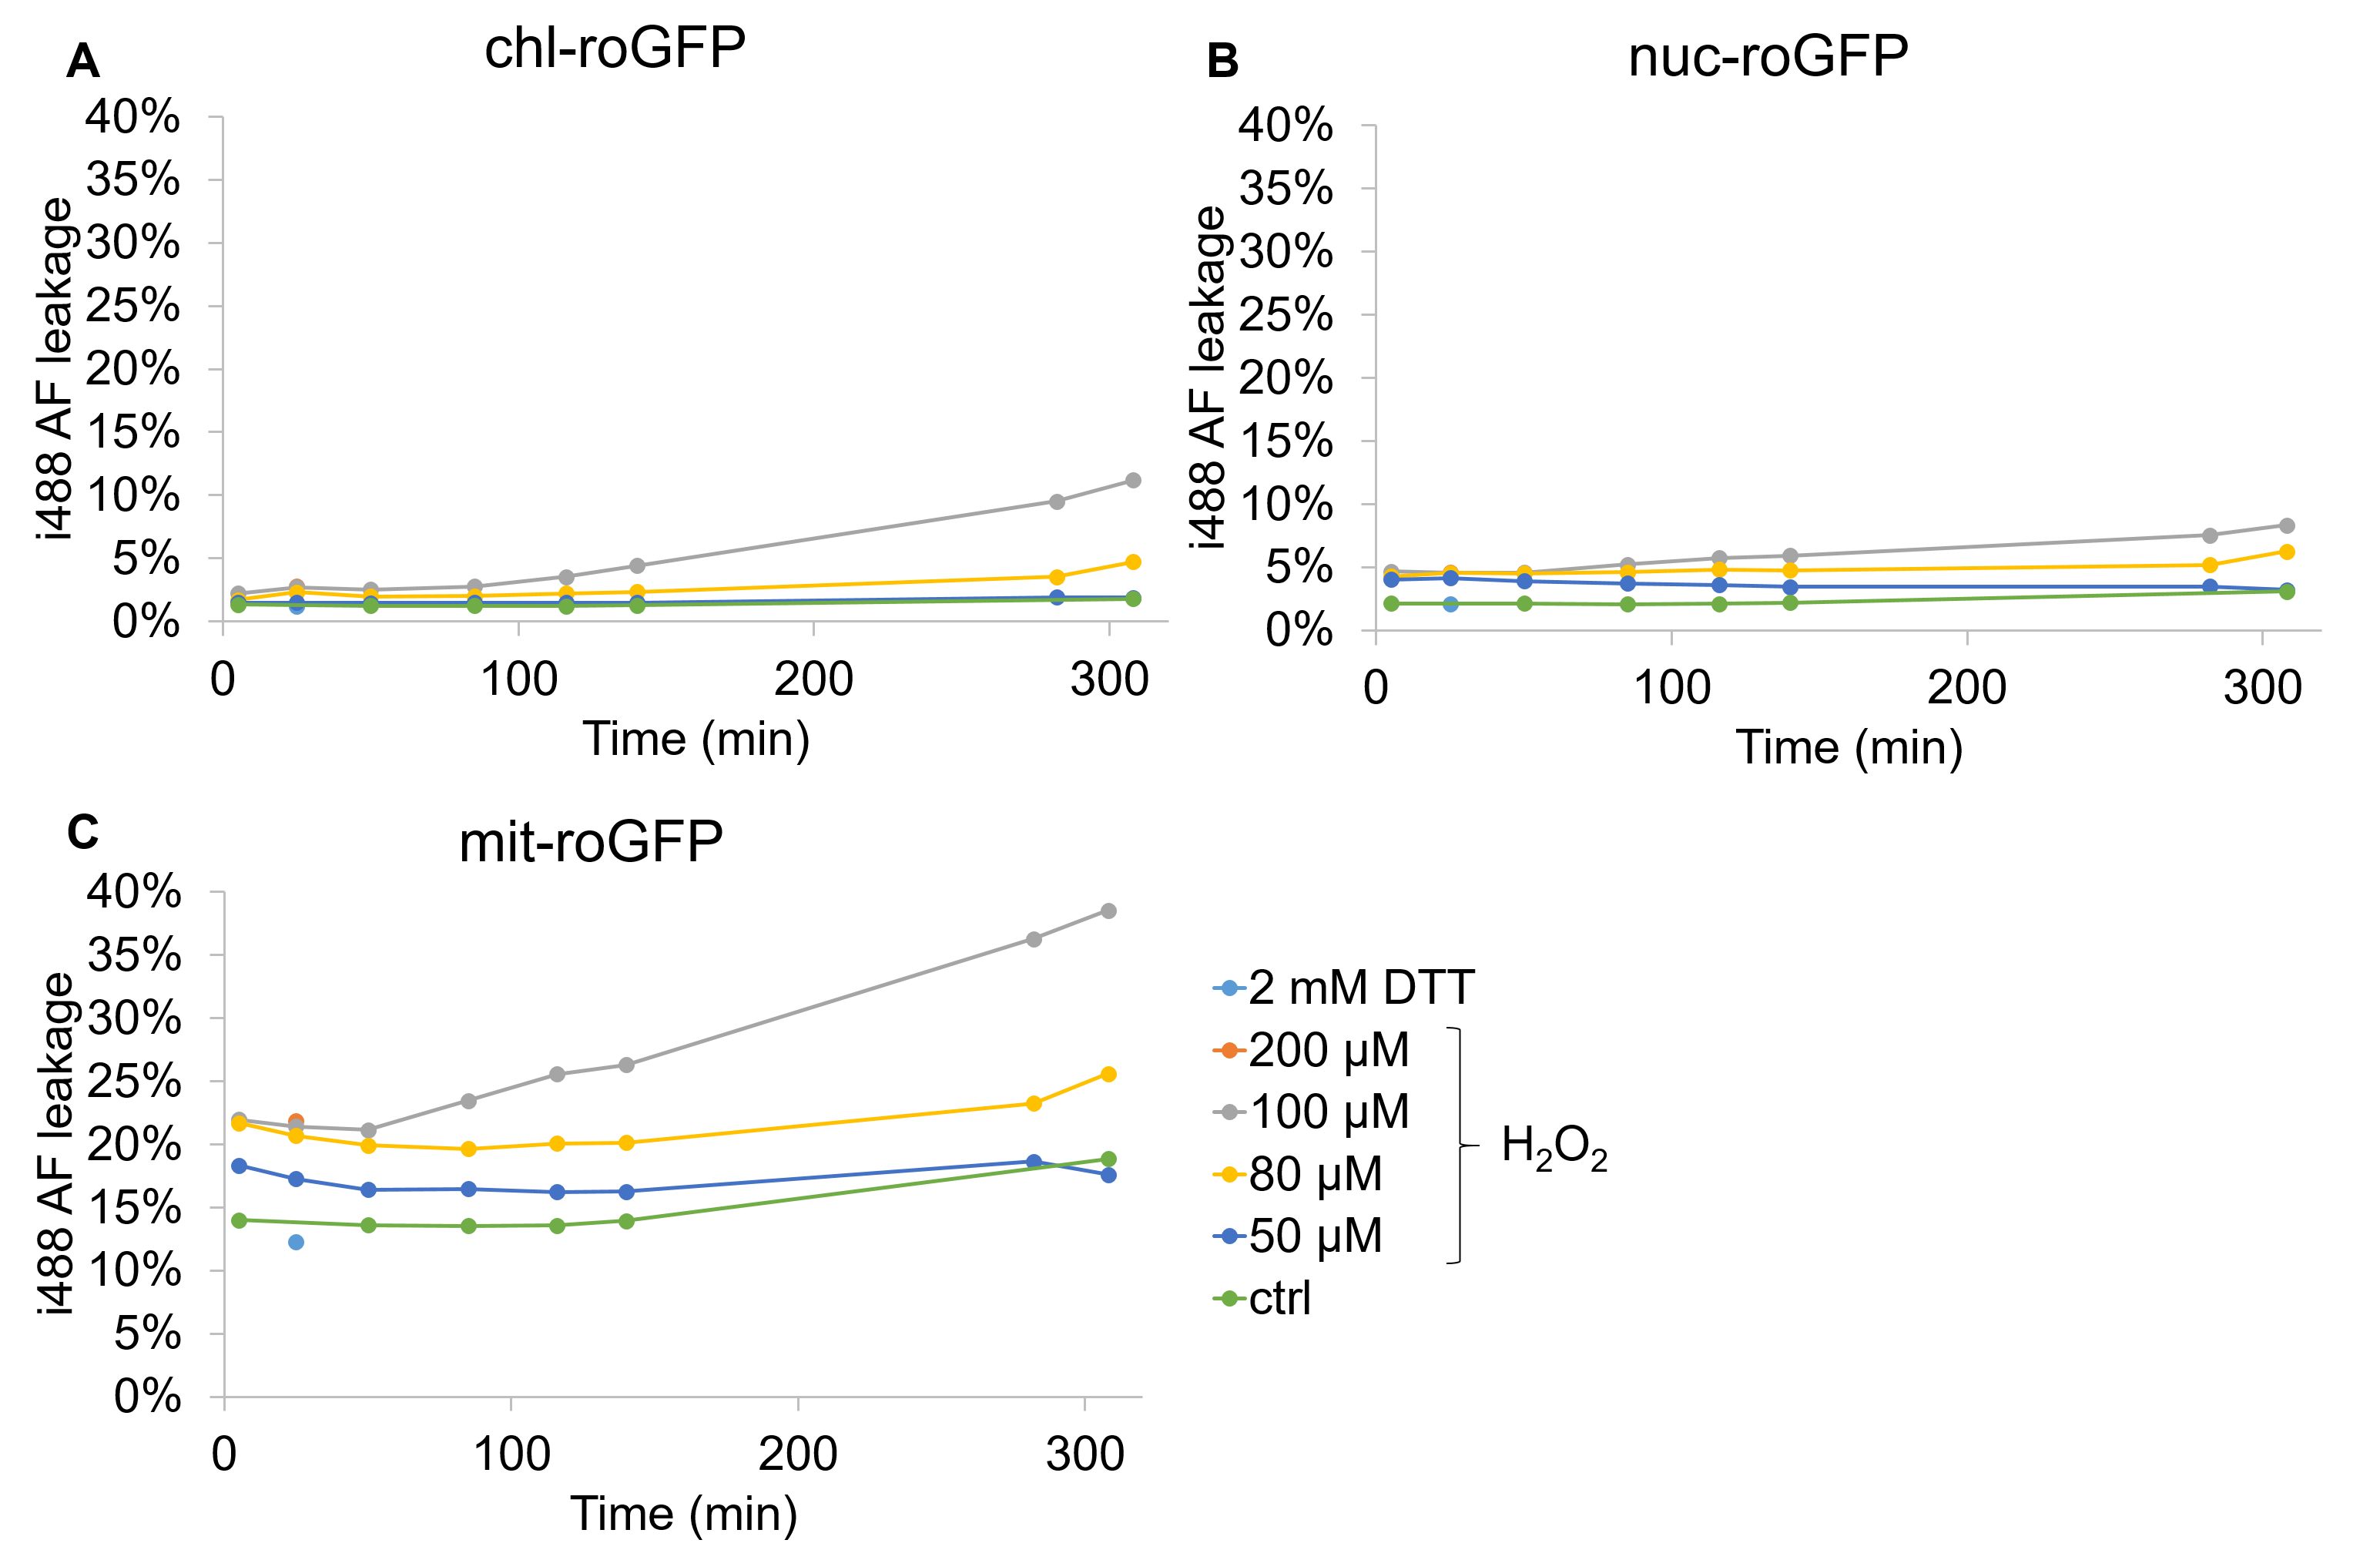

Supplement: supp [file elife-47732-supp-v1.zip › elife_poa_e47732_Figure_2_figure_supplement_6.tif]

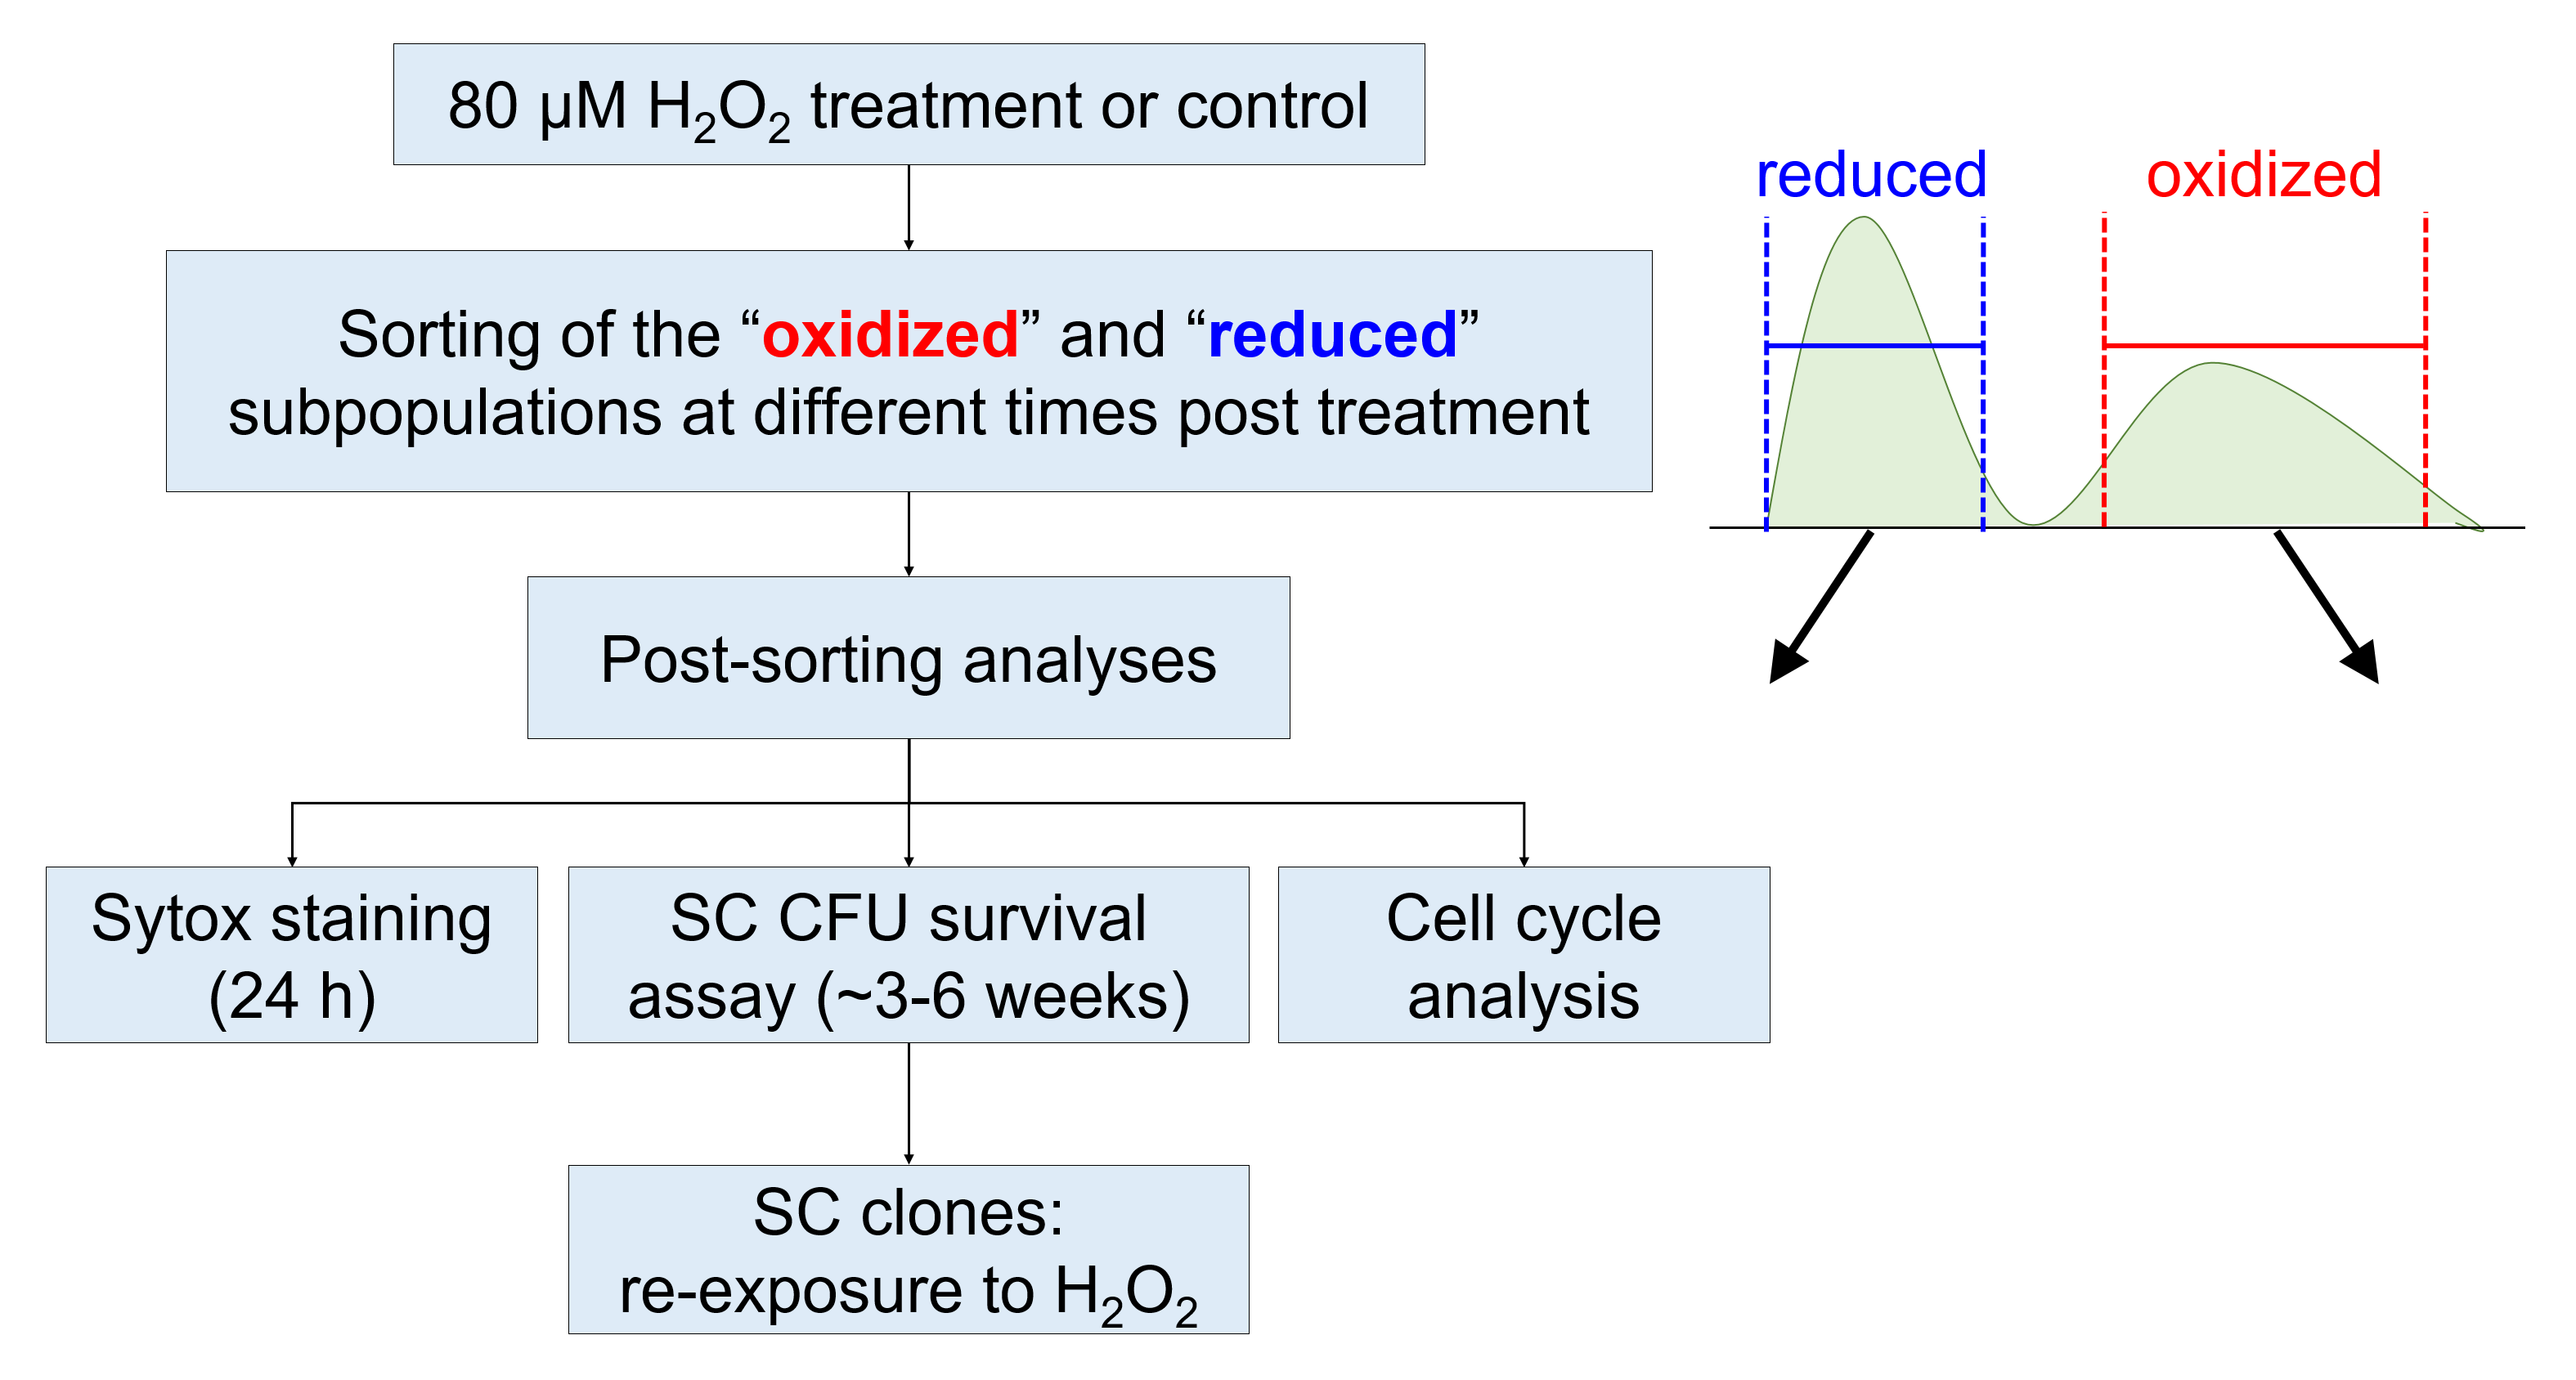

Supplement: supp [file elife-47732-supp-v1.zip › elife_poa_e47732_Figure_3_figure_supplement_1.tif]

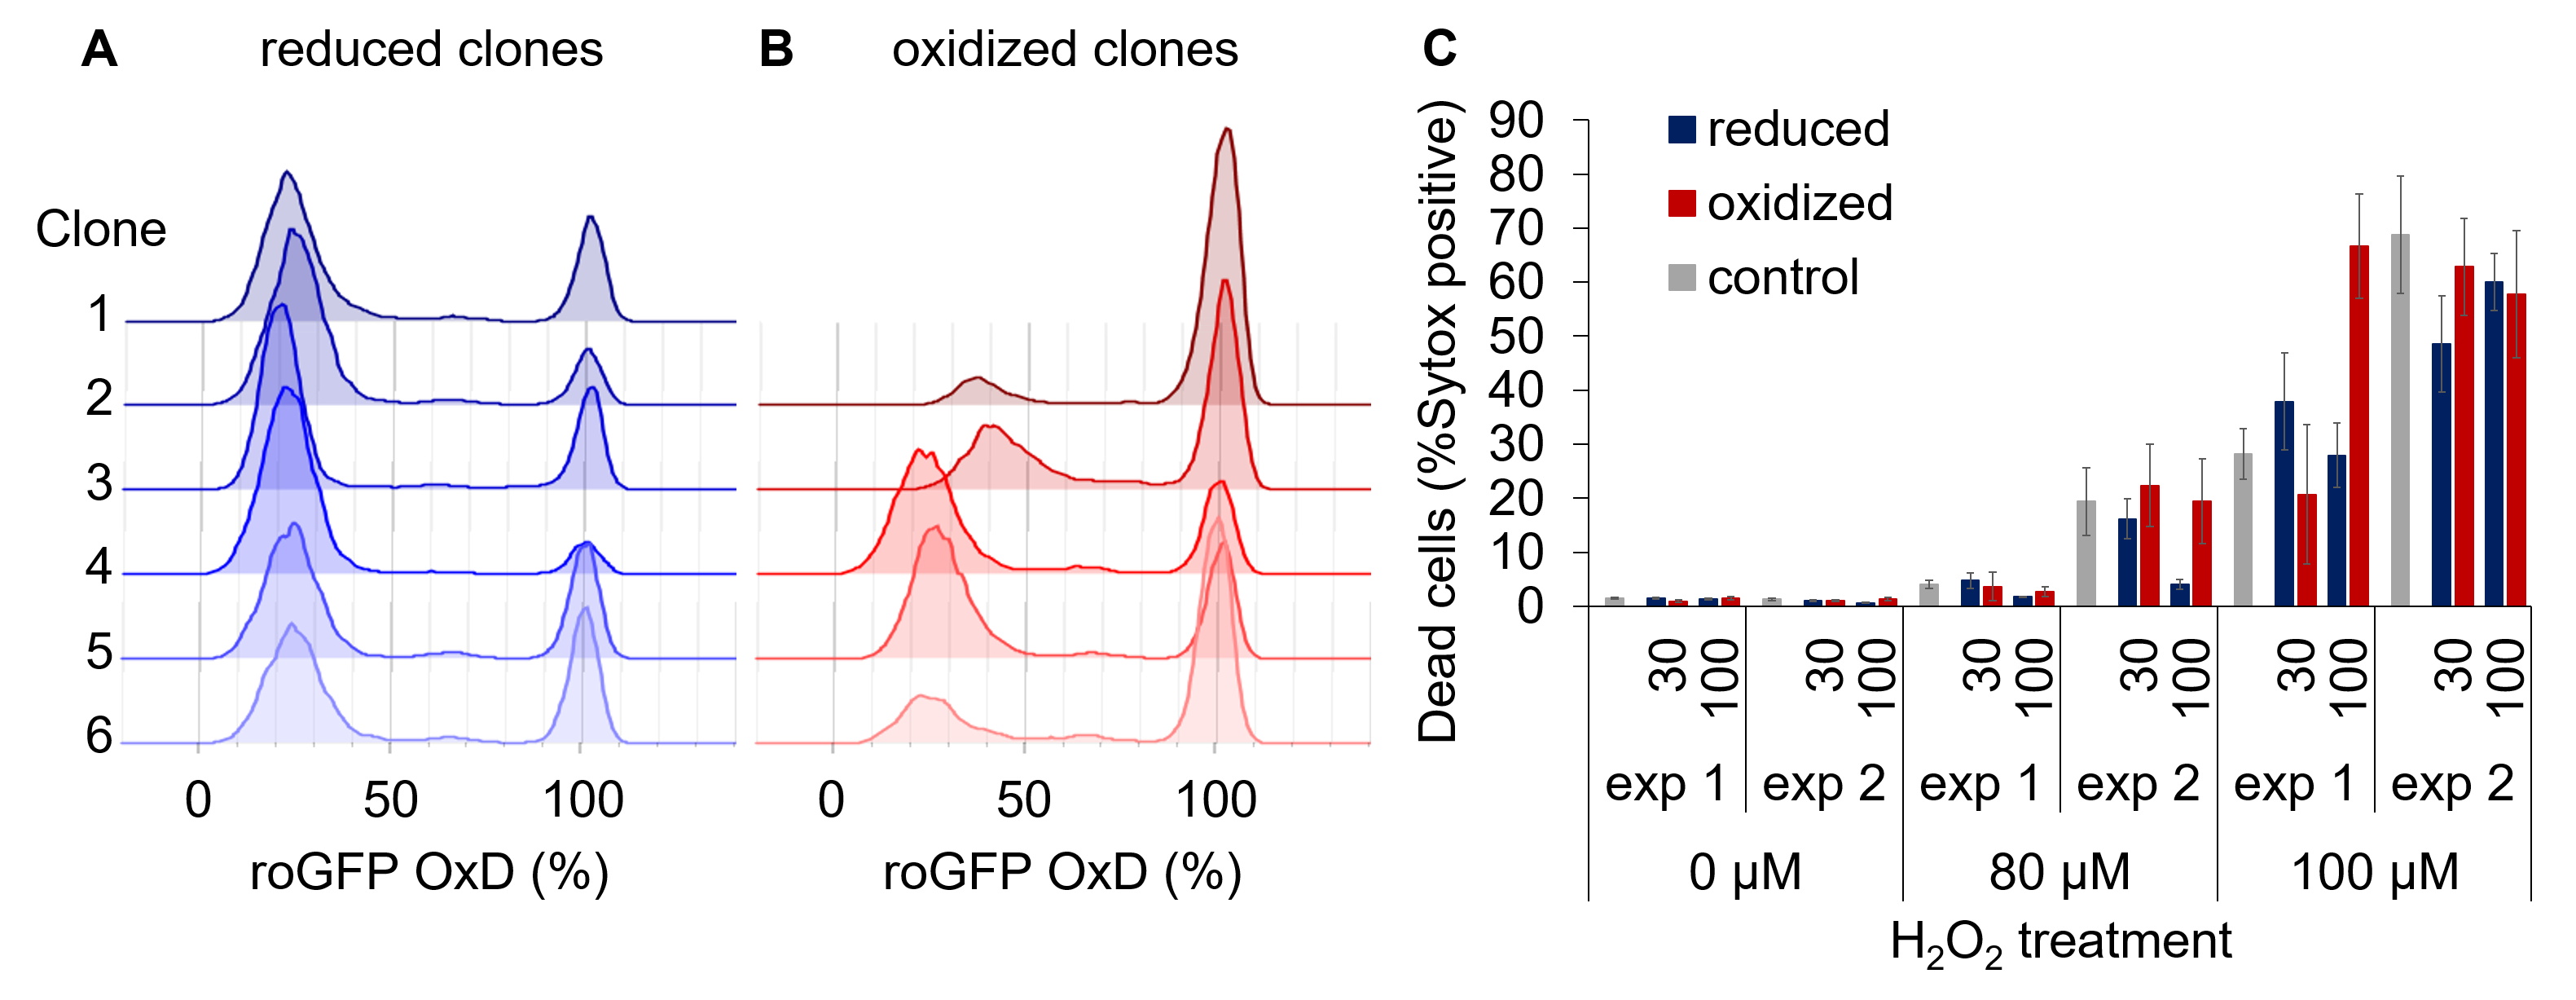

Supplement: supp [file elife-47732-supp-v1.zip › elife_poa_e47732_Figure_5_figure_supplement_1.tif]

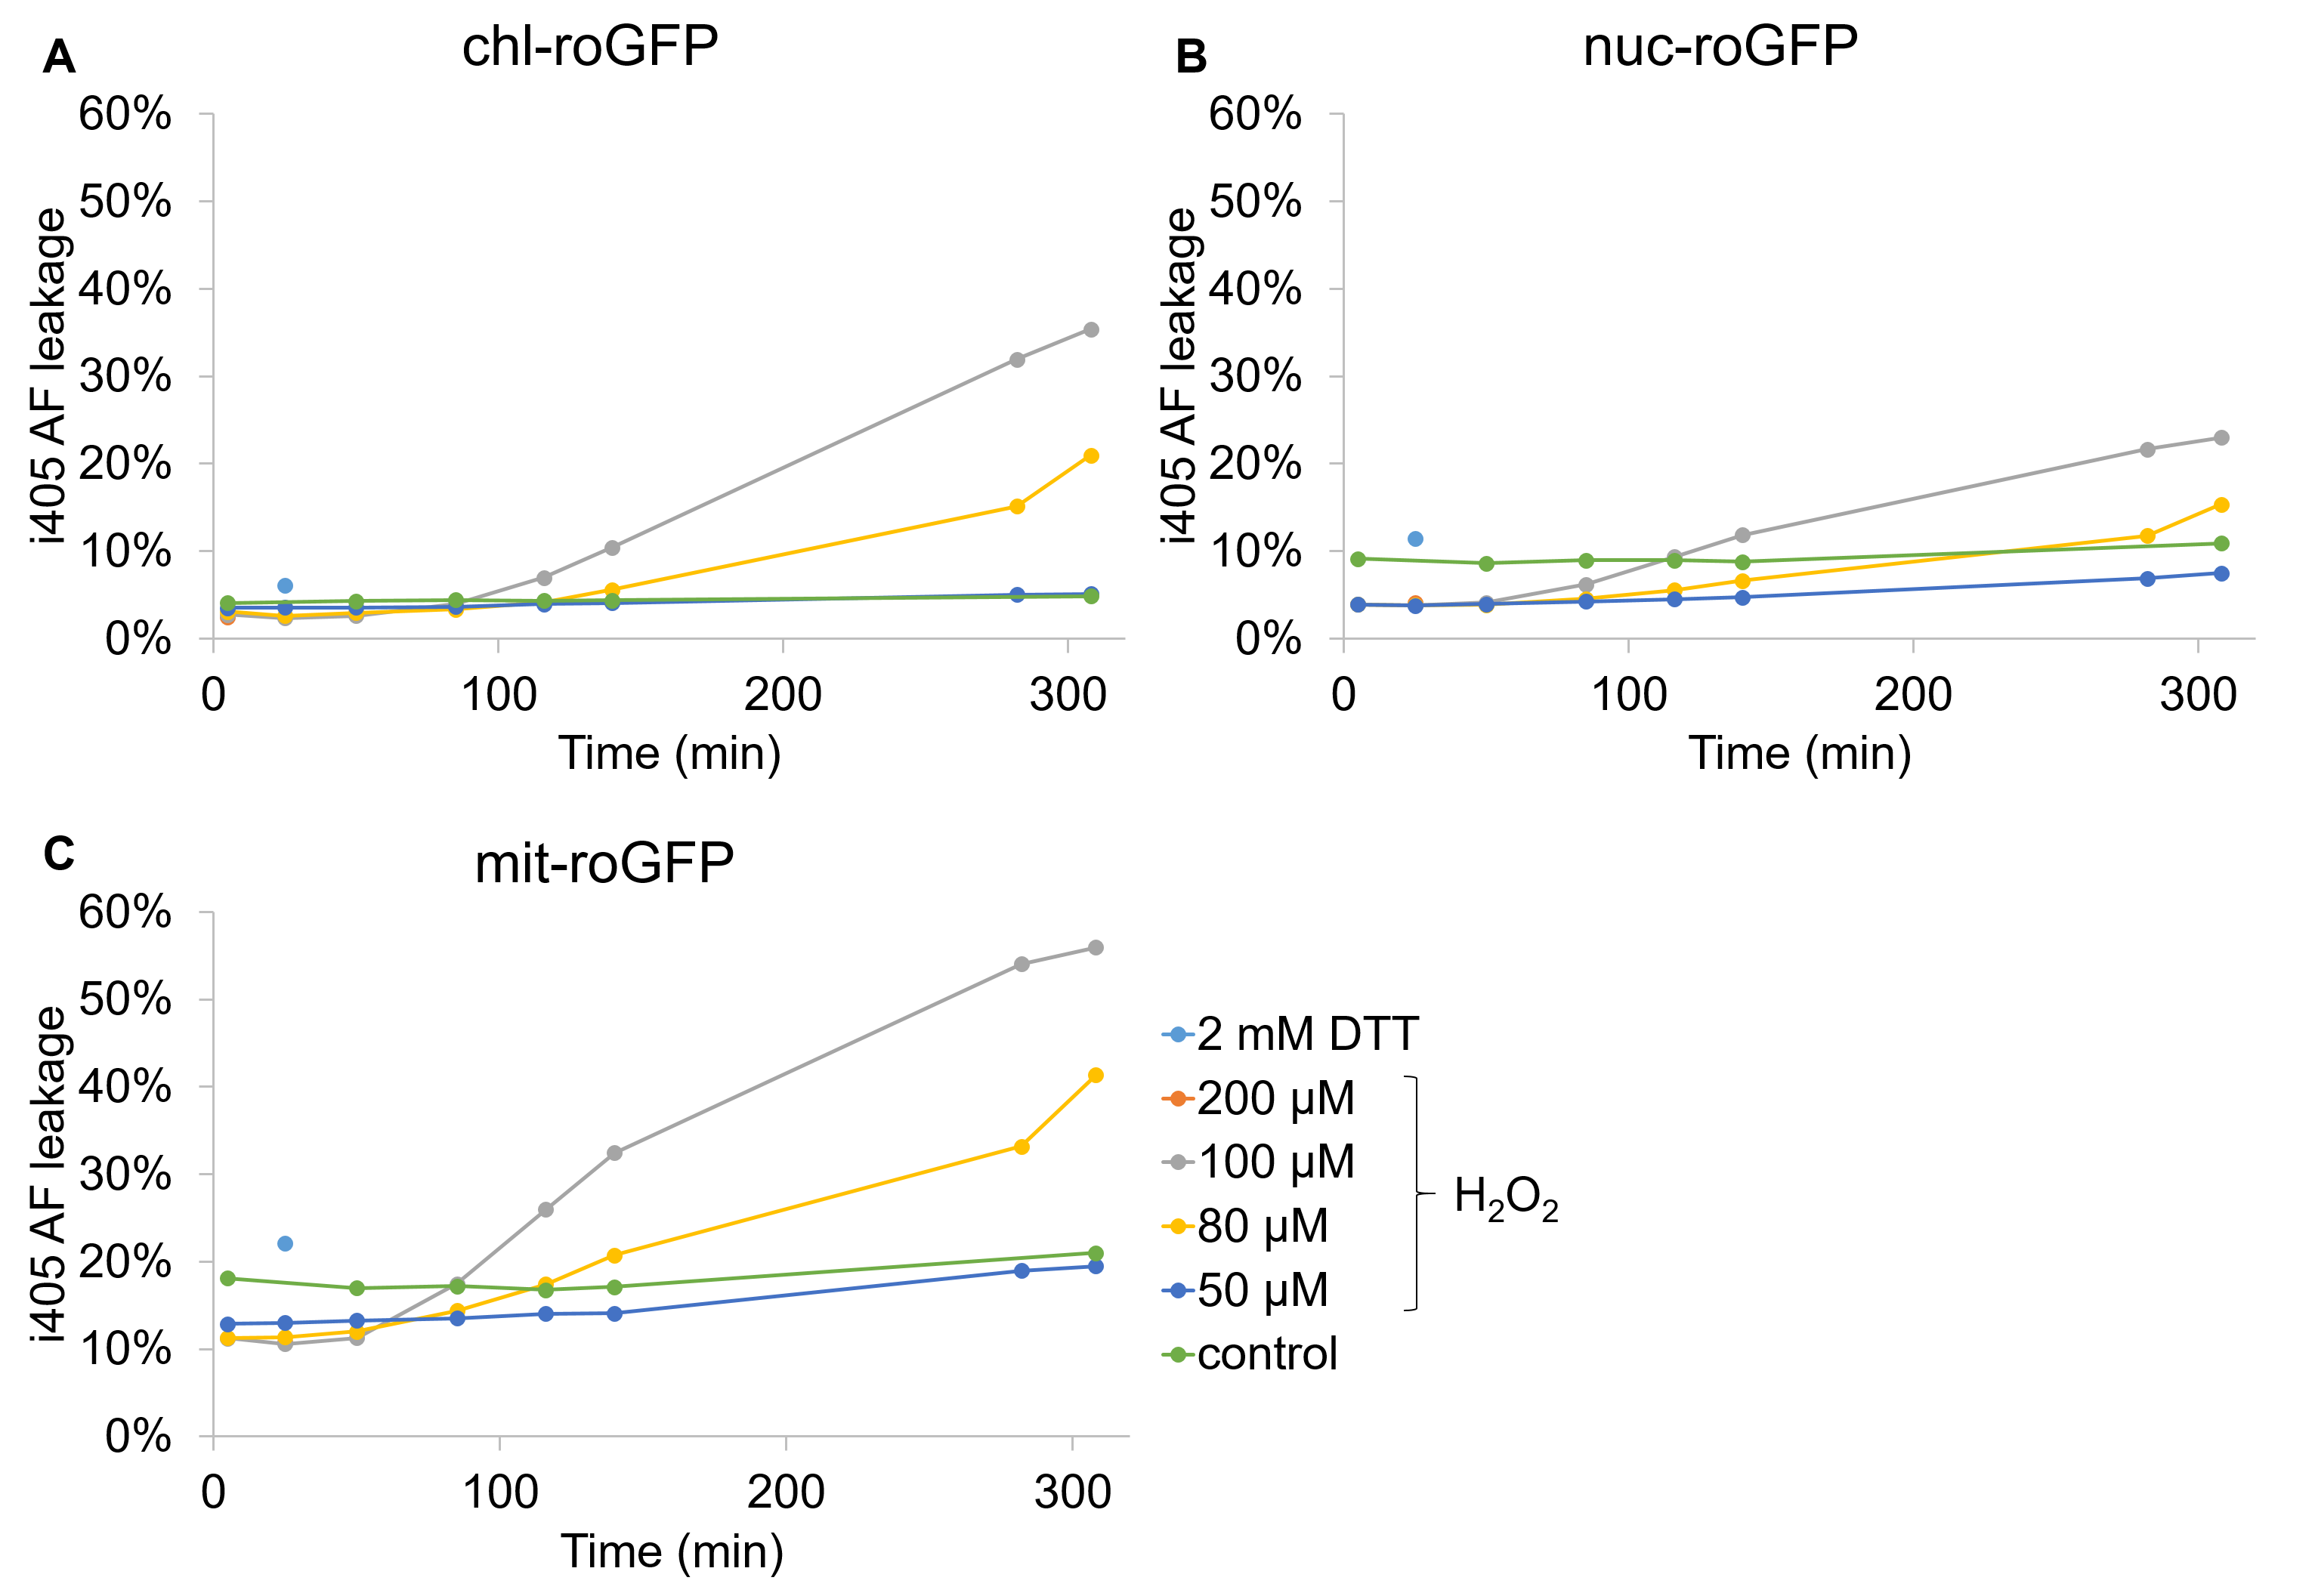

Supplement: supp [file elife-47732-supp-v1.zip › elife_poa_e47732_Figure_2_figure_supplement_5.tif]

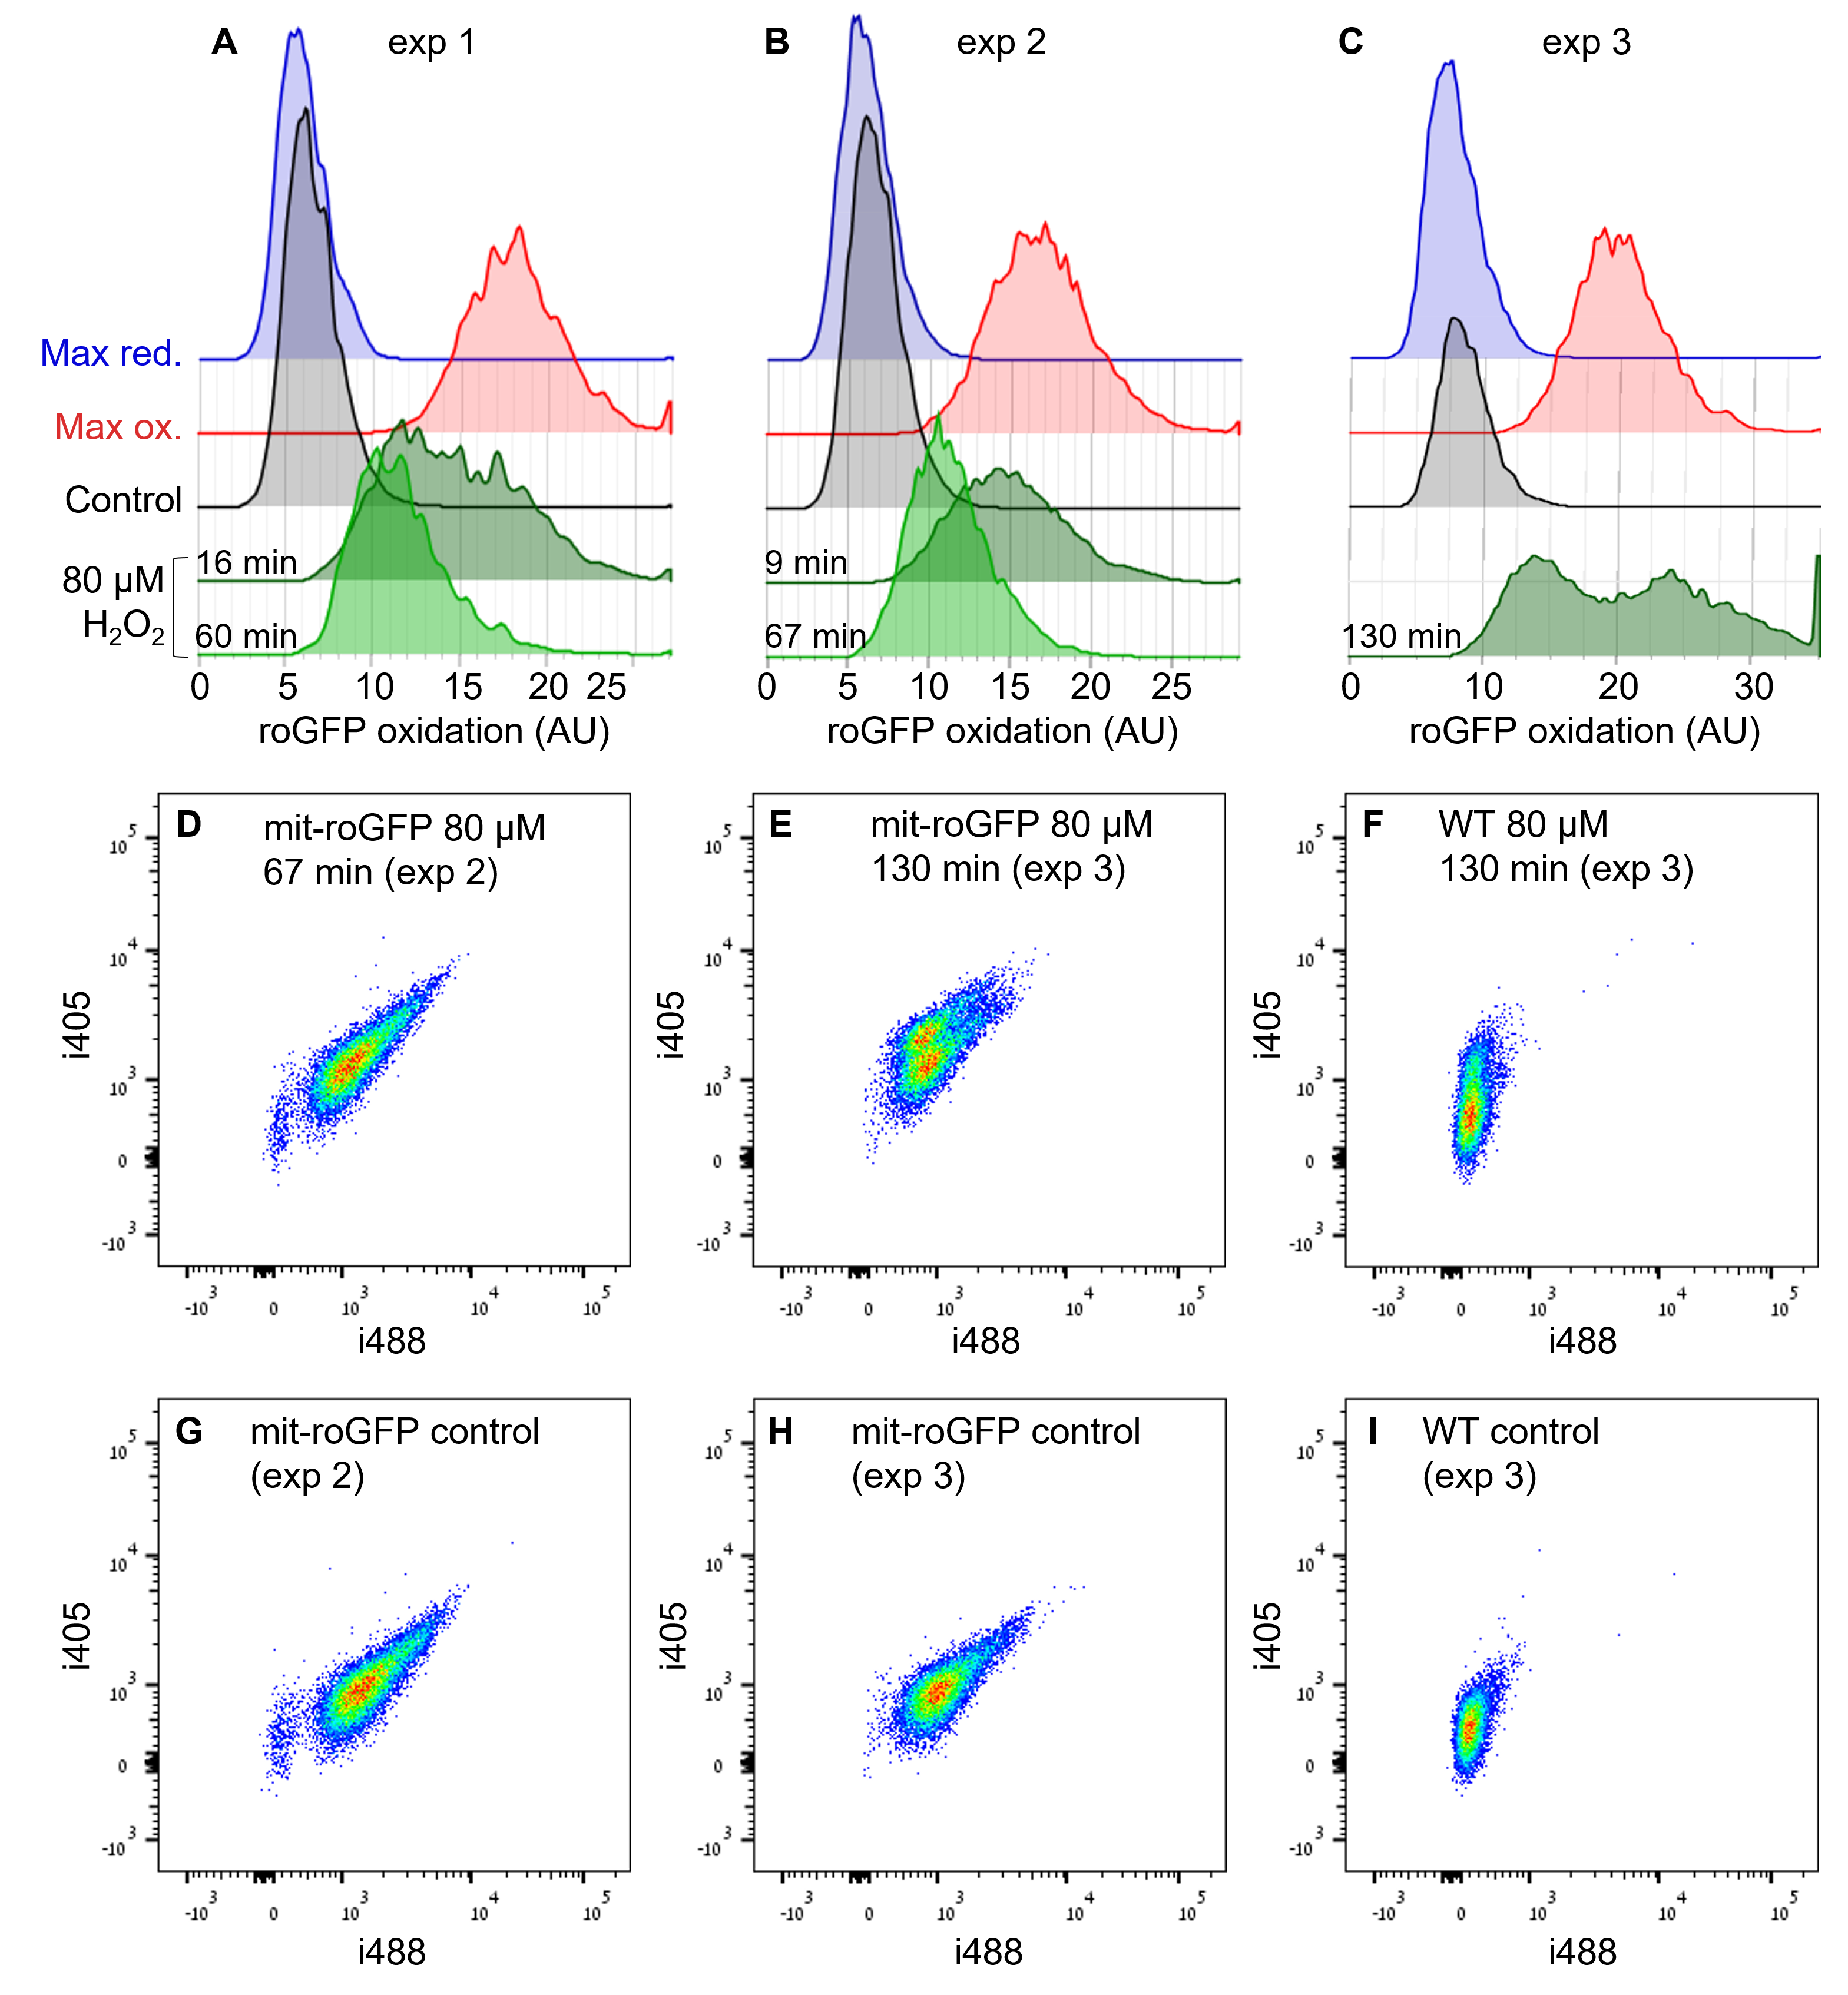

Supplement: supp [file elife-47732-supp-v1.zip › elife_poa_e47732_Figure_2_figure_supplement_4.tif]

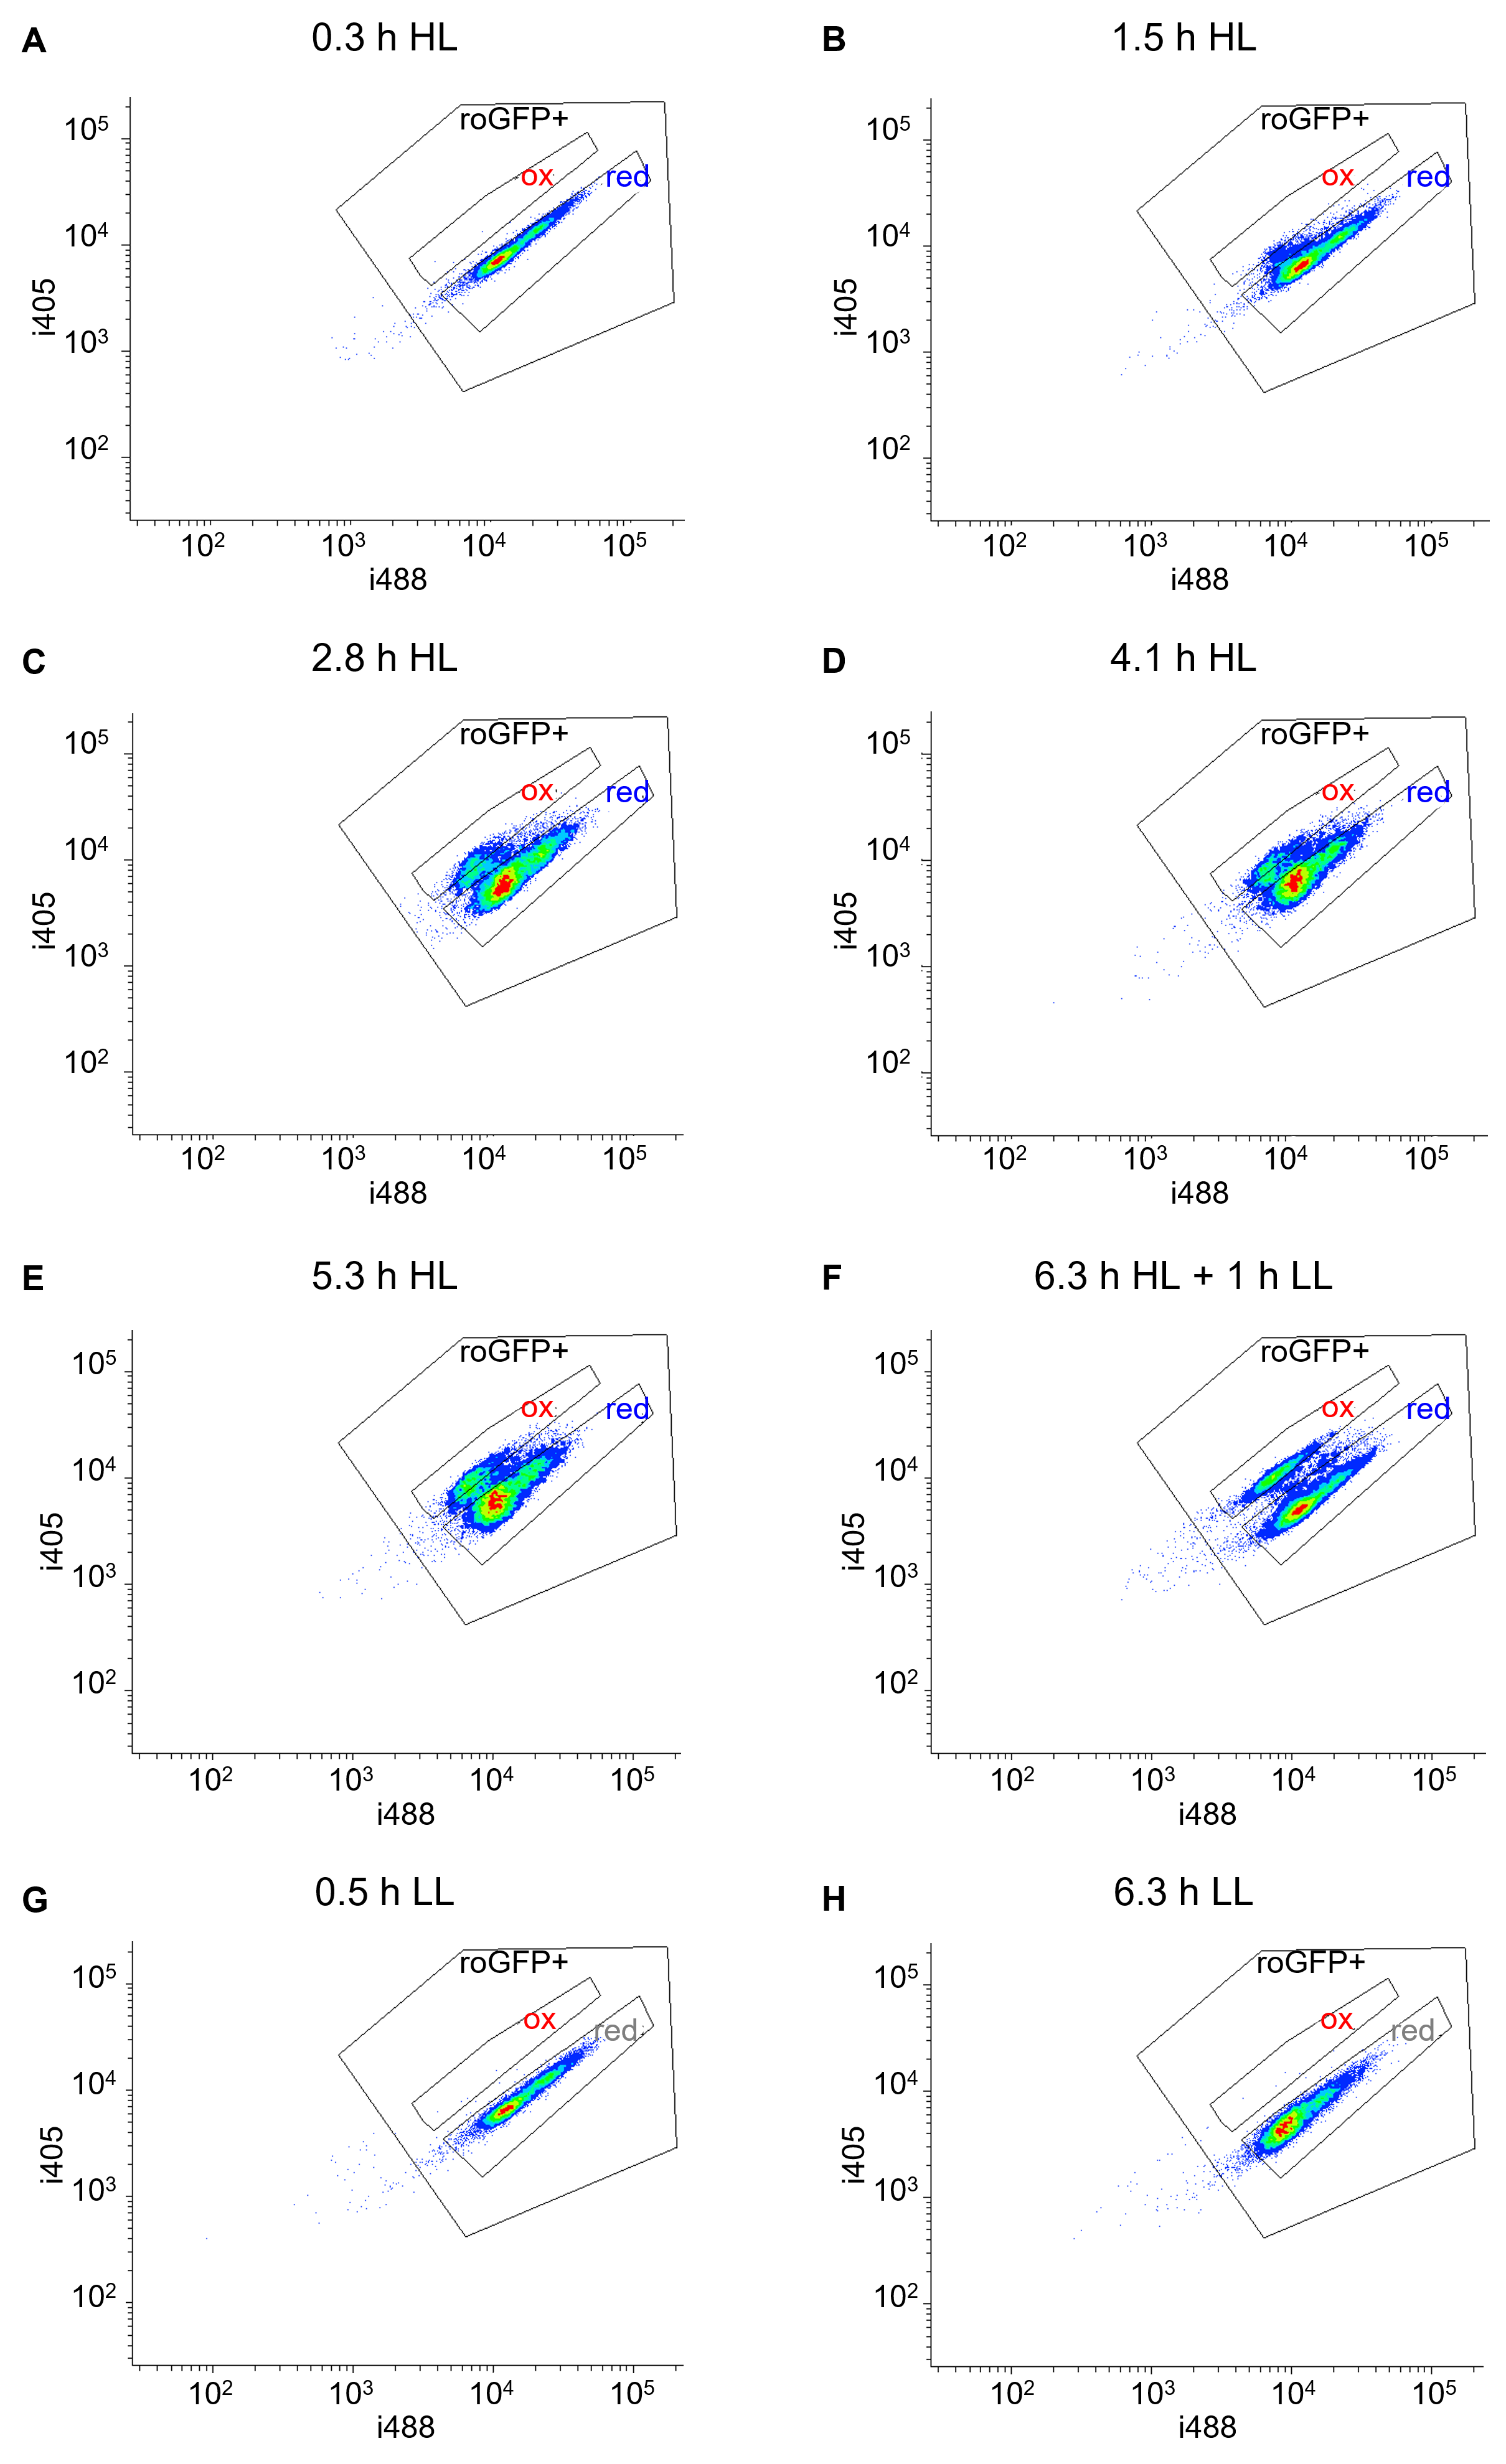

Supplement: supp [file elife-47732-supp-v1.zip › elife_poa_e47732_Figure_8_figure_supplement_1.tif]

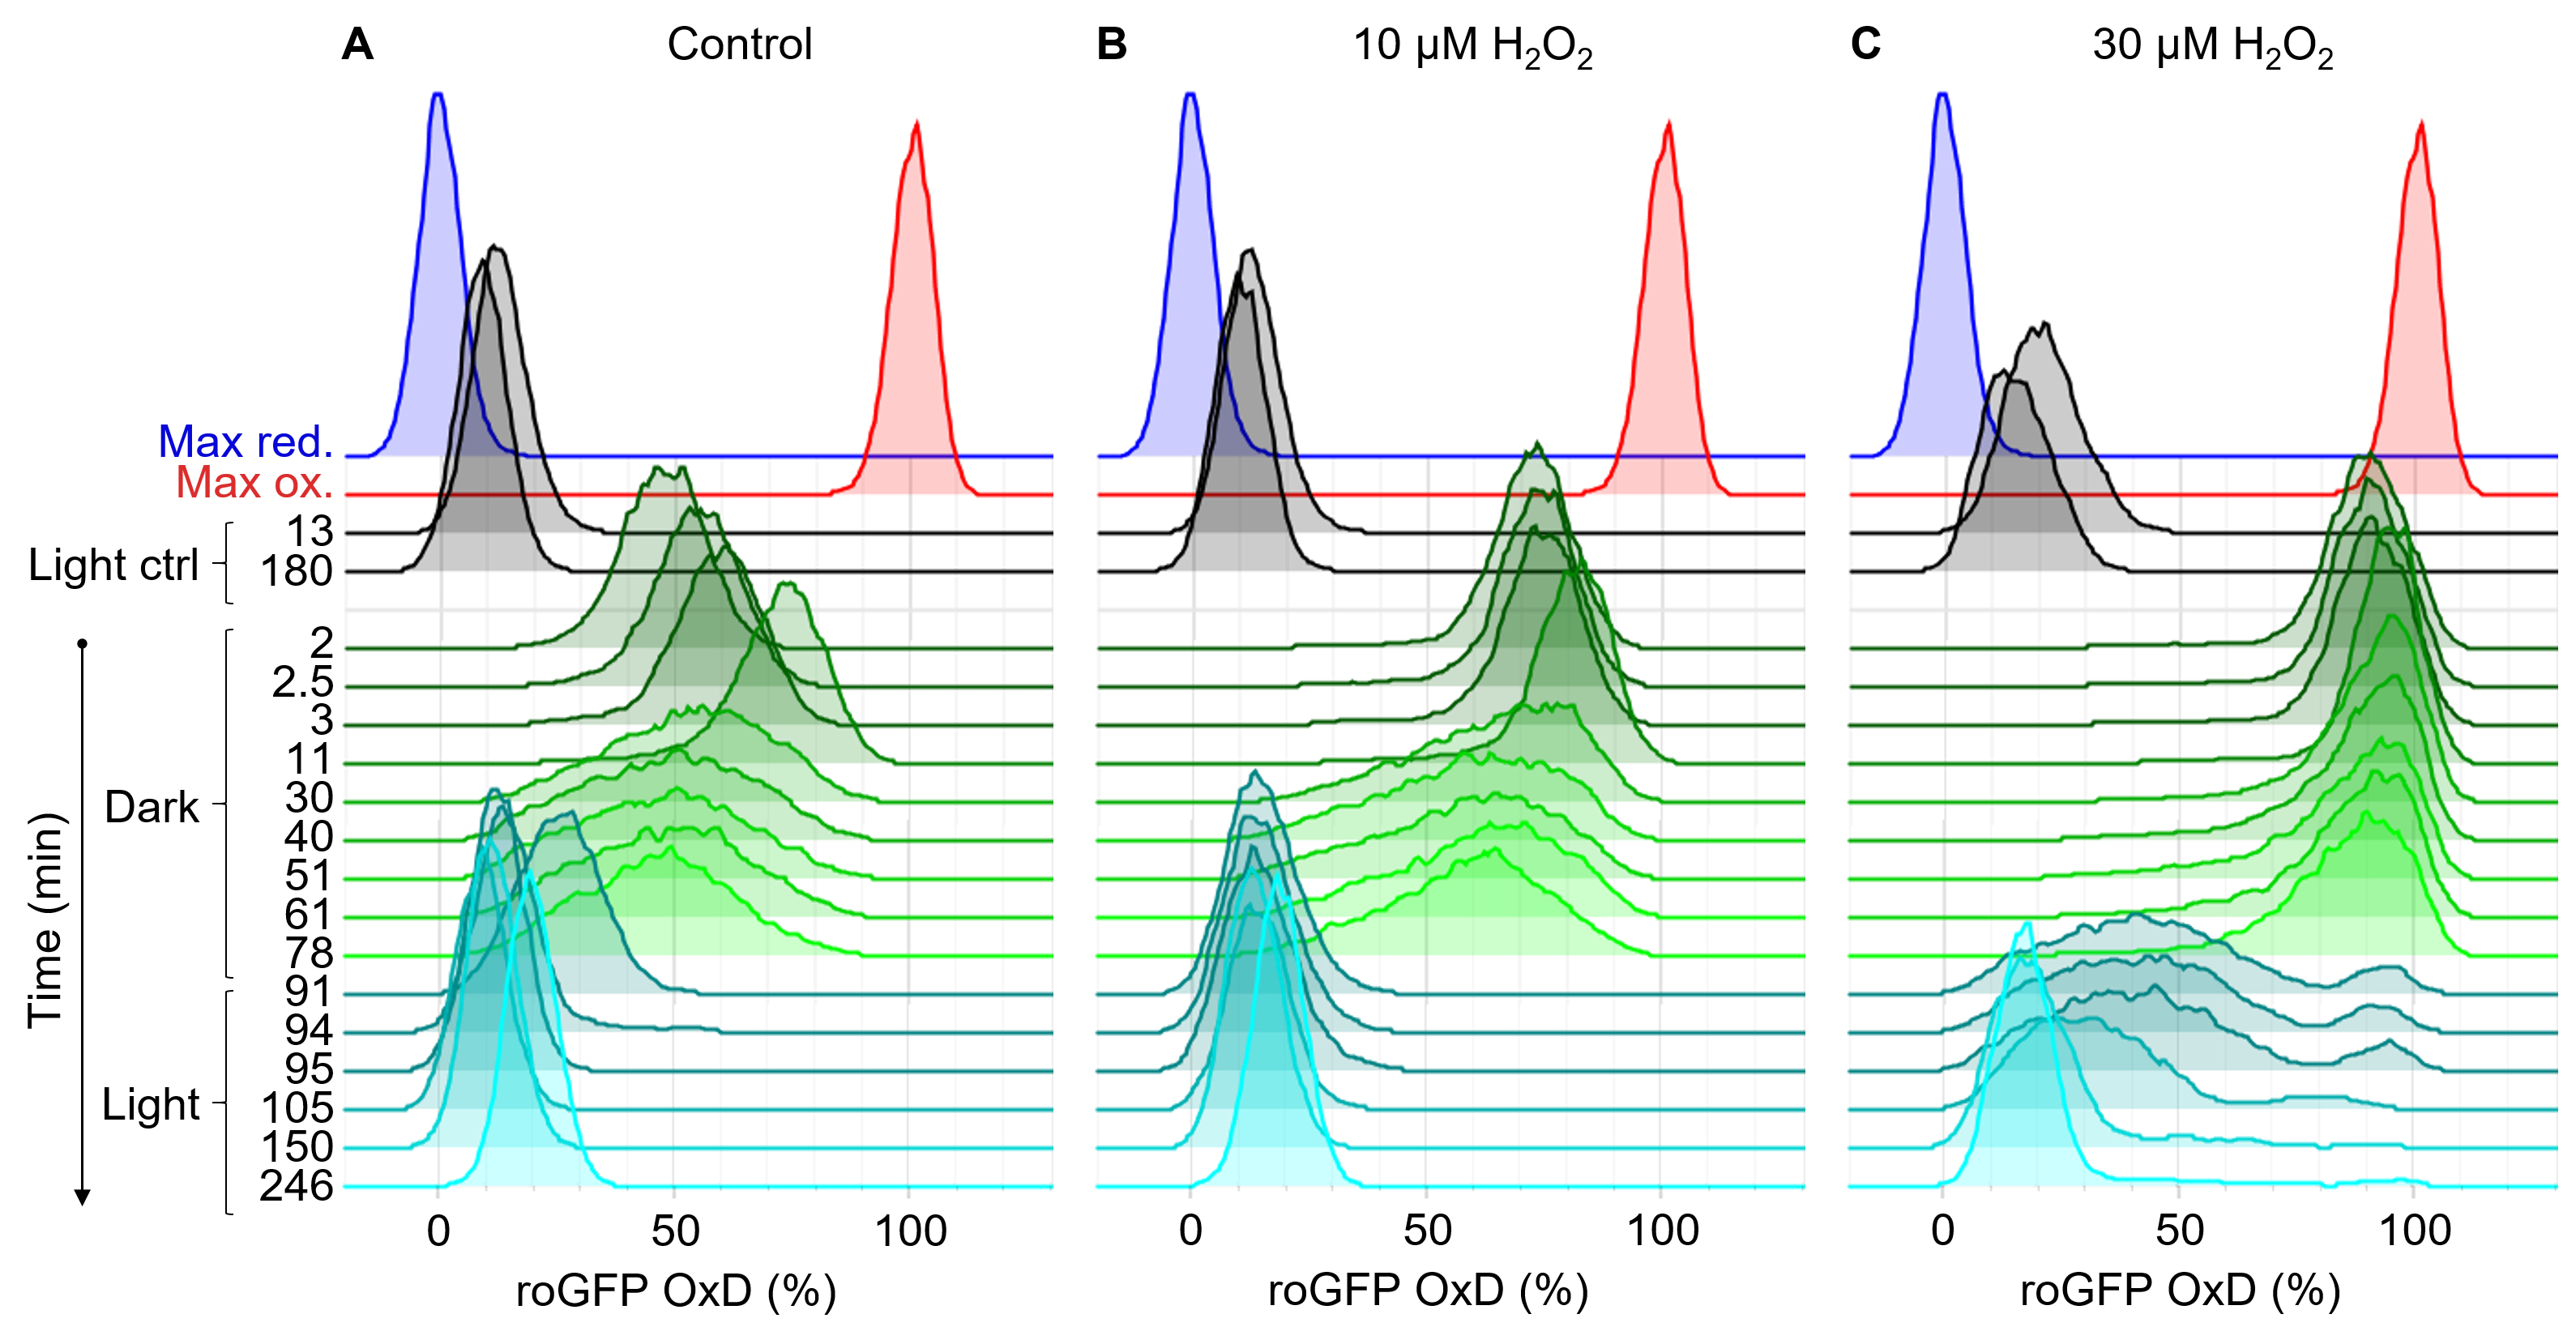

Supplement: supp [file elife-47732-supp-v1.zip › elife_poa_e47732_Figure_7_figure_supplement_1.tif]
